1  
2  
3  
4  
5  
6  
7  
8  
9  
10  
11  
12  
13  
14  
15  
16  
17  
18  
19  
20  
21  
22  
23  
24  
25  
26  
27  
28  
29  
30

**A total synthetic approach to CRISPR/Cas9 genome editing and homology directed repair**

Sara E. DiNapoli<sup>1,2\*</sup>, Raul Martinez-McFaline<sup>1,2\*</sup>, Caitlin K. Gribbin<sup>1,2\*</sup>, Paul Wrighton<sup>3</sup>, Courtney A. Balgobin<sup>1,2</sup>, Isabel Nelson<sup>1,2</sup>, Abigail Leonard<sup>1,2</sup>, Carolyn R. Maskin<sup>1,2</sup>, Arkadi Shwartz<sup>3</sup>, Eleanor D. Quenzer<sup>3</sup>, Darya Mailhiot<sup>4</sup>, Clara Kao<sup>5</sup>, Sean C. McConnell<sup>5</sup>, Jill L.O. de Jong<sup>5</sup>, Wolfram Goessling<sup>3,6</sup>, Yariv Houvras<sup>1,2,7\*\*</sup>

1. Department of Surgery, Weill Cornell Medical College, New York Presbyterian Hospital, New York, NY, USA
2. Meyer Cancer Center, Weill Cornell Medical College, New York Presbyterian Hospital, New York, NY, USA
3. Department of Medicine, Division of Genetics, Brigham and Women’s Hospital, Harvard Medical School, Boston, MA, USA
4. Department of Surgery, Animal Resources Center, University of Chicago, Chicago, IL, USA
5. Department of Pediatrics, University of Chicago, Chicago, IL, USA
6. Division of Gastroenterology, Massachusetts General Hospital, Harvard Medical School, Boston, MA, USA
7. Department of Medicine, Weill Cornell Medical College, New York Presbyterian Hospital, New York, NY, USA

\* These authors contributed equally to this work.  
\*\* Correspondence and requests for materials should be addressed to Y.H. (email: yah9014@med.cornell.edu).

31 **ABSTRACT**

32

33 CRISPR/Cas9 has become a powerful tool for genome editing in zebrafish that permits  
34 the rapid generation of loss of function mutations and the knock-in of specific alleles  
35 using DNA templates and homology directed repair (HDR). We compared synthetic,  
36 chemically modified sgRNAs to in vitro transcribed sgRNAs and demonstrate the  
37 increased activity of synthetic sgRNAs in combination with recombinant Cas9 protein.  
38 We developed an in vivo genetic assay to measure HDR efficiency and we utilized this  
39 assay to optimize the design of synthetic DNA templates to promote HDR. Utilizing  
40 these principles, we successfully performed knock-in of fluorophores at multiple  
41 genomic loci and demonstrate transmission through the germline at high efficiency. We  
42 demonstrate that synthetic HDR templates can be used to knock-in bacterial  
43 nitroreductase (*ntr*) to facilitate lineage ablation of specific cell types. Collectively, our  
44 data demonstrate the utility of combining synthetic sgRNAs and dsDNA templates to  
45 perform homology directed repair and genome editing in vivo.

46

47 **INTRODUCTION**

48

49 CRISPR/Cas9 has been used for a wide range of experimental applications, and  
50 zebrafish has been a key model organism to test and validate strategies for genome  
51 editing {Jao, 2013 #1}{Shah, 2015 #3}. Repair of CRISPR-generated double-stranded  
52 breaks (DSBs) by non-homologous end joining (NHEJ) leads to insertions and deletions  
53 (indels) which may result in loss of function of the targeted gene product. By supplying  
54 an exogenous DNA template, DSBs can be repaired through homology directed repair  
55 (HDR), allowing for precision genome editing, including base pair changes and insertion  
56 of protein tags. Prior studies reporting genome editing in zebrafish have used single-  
57 stranded donor oligonucleotides (ssODN) to knock-in short DNA sequences {Hruscha,  
58 2013 #34}{Burg, 2018 #35}{Irion, 2014 #7}{Hwang, 2013 #42} or plasmid-based donor  
59 vectors to knock-in fluorophores {Auer, 2014 #6}{Hisano, 2015 #36}{Hoshijima, 2016  
60 #9}{Ota, 2016 #38}{Kimura, 2014 #11}. The efficiency of transmitting fluorophore

61 knock-in through the germline has varied widely. We reasoned that the use of synthetic  
62 reagents could permit a comparison of approaches and rational optimization.  
63 Reports have described an increased efficiency of CRISPR/Cas9 targeting in human  
64 cells using chemically modified synthetic sgRNAs {Hendel, 2015 #12}{Rahdar, 2015  
65 #13}. We evaluated synthetic sgRNAs and found that they outperform conventional in  
66 vitro transcribed (IVT) sgRNAs. We used these sgRNAs in combination with synthetic  
67 DNA templates and we developed an assay for HDR in zebrafish utilizing an *mitfa*  
68 mutant, b692. This assay allowed us to quantitatively compare multiple templates for  
69 HDR and correlate phenotypic and molecular efficiency. We performed precise genomic  
70 editing and generated in-frame gene fusions with fluorophores using synthetic reagents,  
71 including linear dsDNA templates. Knock-in alleles were transmitted through the  
72 germline at efficiencies of 14–25%. Finally, we used HDR to target bacterial  
73 nitroreductase (*ntr*) to the liver-specific gene *fabp10a* to perform lineage ablation of  
74 hepatocytes. These results demonstrate that the combination of synthetic sgRNAs and  
75 dsDNA templates result in efficient genome editing in zebrafish.

76

## 77 **MATERIALS AND METHODS**

78

### 79 **sgRNA and HDR template sequence selection**

80

81 Gene-specific sgRNAs sequences were selected using a combination of prediction tools  
82 including sgRNA Scorer 1.0 and 2.0{Chari, 2015 #14}{Chari, 2017 #15},  
83 GuideScan{Perez, 2017 #16}, or CRISPRz{Varshney, 2016 #17}. We selected sgRNA  
84 sequences with zero predicted off targets with one base pair mismatch. Design  
85 principles for HDR templates included a mutated sgRNA recognition sequence,  
86 incorporation of barcoded nucleotides, homology arms, and incorporation of  
87 heterologous DNA sequence encoding EGFP or mScarlet. HDR templates were  
88 ordered as gBlock Gene Fragments (Integrated DNA Technologies [IDT]). For single  
89 stranded DNA templates Ultramer DNA Oligonucleotides (IDT) were used. gBlocks

90 were resuspended in nuclease-free water to a concentration of 50  $\eta$ g/ $\mu$ L and stored at -  
91 20°C.

92

### 93 **Preparation of sgRNAs**

94

95 Synthesis of IVT sgRNAs was performed from dsDNA templates (gBlock, IDT) using the  
96 SureGuide gRNA Synthesis Kit (Agilent, 5190-7719). Templates contained a T7  
97 promoter and GG dinucleotide to promote transcription (TAATACGACTCACTATAGG),  
98 a 20bp target site without PAM site, and a composite crRNA/tracrRNA single guide RNA  
99 sequence (sgRNA)

100 (GTTTTAGAGCTAGAAATAGCAAGTTAAAATAAGGCTAGTCCGTTATCAACTTGAAA  
101 AAGTGGCACCGAGTCGGTGCCTTTT). 50 $\eta$ g of dsDNA template (10 $\eta$ g/ $\mu$ L) was in vitro  
102 transcribed in a 25 $\mu$ L reaction and incubated at 37°C for 3–4 hours. Following DNase  
103 digestion sgRNAs were column-purified and eluted in H<sub>2</sub>O per the manufacturer's  
104 (Agilent) instructions. Concentration was determined using a Nanodrop  
105 spectrophotometer and 200 $\eta$ g of the sgRNA was visualized on an agarose gel for  
106 quality control.

107

108 Gene-specific crRNAs were synthesized by IDT as Alt-R® CRISPR-Cas9 crRNAs. A  
109 bipartite synthetic sgRNA was heteroduplexed using gene-specific crRNAs and a  
110 tracrRNA according to manufacturer recommendations. For simplicity the bipartite  
111 synthetic sgRNA is referred to as a synthetic sgRNA throughout the manuscript.

112

### 113 **Microinjection**

114

115 For global editing with a single sgRNA, 250 $\rho$ g sgRNA and 500 $\rho$ g recombinant Cas9  
116 protein (rCas9, PNA Bio CP01) were injected into the yolk of one-cell stage embryos.  
117 Cas9 nickase (D10A Cas9 nickase protein with NLS, PNABio CN01) was purchased  
118 from PNA Bio. To generate deletions, 250 $\rho$ g sgRNA 1, 250 $\rho$ g sgRNA 2, and 500 $\rho$ g  
119 rCas9 were injected into the yolk of one-cell stage embryos. For HDR injections, 250 $\rho$ g

120 sgRNA, 500pg rCas9, and 37.5pg HDR template were injected into one-cell stage  
121 embryos. Throughout the manuscript rCas9 refers to recombinant Cas9 protein.

122

### 123 **Assessment of gene editing efficiency**

124

125 Genomic DNA was isolated from individual embryos (24–48 hours post fertilization [hpf])  
126 using DirectPCR Lysis Reagent (Viagen, 102-T) supplemented with Proteinase K at  
127 20µg/mL (Qiagen, 158920). Samples were incubated at 55°C for 60 min followed by  
128 85°C for 45 min. Genomic DNA was PCR amplified using specified primers  
129 (Supplementary Table). 8 µL of PCR product was mixed with 1.6µL NEB Buffer 2 and  
130 6.4µL of water and was incubated at 95°C for 5 minutes followed by cooling from 95°C–  
131 85°C at -2°C/second and 85–25°C at -0.1°C/second. Following hybridization, the DNA  
132 was subject to T7 endonuclease (T7EI) digestion with 2U of T7EI endonuclease (New  
133 England BioLabs [NEB], M0302) and 1 hour incubation at 37°C. The reaction product  
134 was visualized on a 2% agarose gel.

135

136 For clonal analysis, the PCR product was cloned into pCRII-TOPO (Invitrogen,  
137 K460001) and Sanger sequenced (Genewiz). Sequences were compared to reference  
138 genome and non-targeting controls to identify indels using CrispRVariants{Lindsay,  
139 2016 #18} and MacVector (Version 15.5).

140

141 For CRISPR-STAT analysis, sperm samples from potential founders were collected with  
142 10µL capillary tubes as previously described, and then followed the HOTShot method  
143 with 25µL alkaline lysis buffer to prepare DNA templates{Draper, 2009 #19}{Meeker,  
144 2007 #20}. Tail clips were prepared similarly. The CRISPR-STAT protocol was used to  
145 perform fluorescence-based genotyping{Carrington, 2015 #21}. Primers sequences  
146 used for the CRISPR-STAT assay were *slc6a15* FOR,  
147 tgtaaacgacggccagtGGCCACGACCTACTACTGGTAT, which includes (lowercase)  
148 M13 tag for binding to a fluorescent-labeled M13 primer; and *slc6a15* REV,  
149 gtgtcttTATAGATGCTGCGTCACGTTTC, which include the (lowercase) ‘PIG tail’ tag

150 that helps ensure uniform product size, via Taq adenylation{Holleley, 2009 #22}.  
151 Relative amounts of each uniquely sized PCR product (>100 bp and >100 peak height)  
152 were calculated with area under the curve measurements using Applied Biosystems  
153 Peak Scanner software.

154  
155 For assessment of deletions, genomic DNA was PCR amplified using primers that  
156 flanked the deletion sgRNAs. PCR products were purified (Qiagen, 28104), Sanger  
157 sequenced, and compared to the reference genome.

### 158 159 **Analysis of HDR efficiency by next-generation sequencing**

160  
161 For analysis of HDR efficiency by next-generation DNA sequencing, 50ng of PCR  
162 amplicon was converted into blunt ends using T4 DNA polymerase (New England  
163 Biolabs, NEB) and *E. coli* DNA polymerase I Klenow fragment (NEB). Libraries were  
164 prepared using the Kapa LTP Library Preparation Kit (Roche). Multiple indexing  
165 adapters were ligated to the ends of the DNA fragments. Ligation reaction products  
166 were purified by AMPure XP beads (NEB) to remove unligated adapters and quantified  
167 using Qubit (Thermo Fisher Scientific) and Bioanalyzer DNA chip (Agilent). Indexed  
168 sample libraries were normalized, pooled, and sequenced using the Illumina HiSeq4000  
169 sequencer at 2x50 cycles. Reads were aligned to the zebrafish genome (GRCz10)  
170 using the Star aligner{Dobin, 2013 #23} and visualized using Integrative Genome  
171 Browser (IGV) {Thorvaldsdottir, 2013 #24}{Robinson, 2011 #25}.

### 172 173 **Imaging**

174  
175 Micrographs of whole embryos and larval animals were taken with a Zeiss Discovery V8  
176 stereomicroscope (Zeiss) equipped with epifluorescence and appropriate filters. Live  
177 imaging of fluorescent larvae was acquired with a Zeiss LSM800 laser scanning  
178 confocal microscope (Zeiss). For melanocyte counting, 48hpf embryos were visualized

179 under the stereoscope and binned into 4 categories (WT, >101, 51–100, or 0–50  
180 melanocytes). Individuals scoring embryos were blinded to the experimental conditions.

181

## 182 **Hepatocyte ablation**

183 HDR injection mixes were made as described above. Approximately 2  $\eta$ L of mix was  
184 injected into the cell of one-cell stage wild-type (Tu) embryos. At 4–6 days post  
185 fertilization (dpf), embryos were screened by confocal microscopy for mosaic mScarlet  
186 expression localized to the liver, and positive larvae were raised to adulthood. F<sub>0</sub> adults  
187 were outcrossed with wild-type (TL) fish, and the F<sub>1</sub> embryos were screened by confocal  
188 microscopy for mScarlet positive livers. Positive larvae were divided and treated with  
189 either 0.2% dimethylsulfoxide (DMSO; Sigma Aldrich) or 10  $\mu$ M metronidazole (Mtz;  
190 Sigma Aldrich 443-48-1) in egg water. After 24 hours, the larvae were washed,  
191 anesthetized with 0.16 mg/mL tricaine-S (MS 222; Western Chemical, Inc.), and  
192 immobilized in 0.8% low melt point agarose (Invitrogen) on glass-bottom dishes  
193 (MatTek). Imaging was performed using a Nikon Ti2 inverted microscope equipped with  
194 a Yokogawa CSU-W1 spinning disk confocal unit and a Zyla 4.2 PLUS sCMOS camera  
195 (Andor), using CFI Plan Aplanachromat Lambda 10x NA 0.45 and 20x NA 0.8 objectives.  
196 Larvae were recovered from the agarose, allowed to recover in the absence of drug for  
197 48 hours, and imaged again.

198

199

## 200 **Zebrafish husbandry**

201

202 Zebrafish strains were maintained according to established guidelines (Westerfield, 2007  
203 #33}. Wild-type animals were from the AB background except when indicated.

204 Experiments were performed in accordance with the recommendations in the Guide for  
205 the Care and Use of Laboratory Animals of the National Institutes of Health. All of the  
206 animals were handled according to approved institutional animal care and use  
207 committee (IACUC) protocols of the respective institutions.

208

## 209 RESULTS

210

### 211 Synthetic sgRNAs lead to highly efficient induction of indels

212

213 In order to directly compare editing efficiencies generated by synthetic sgRNA versus  
214 IVT sgRNA), we targeted tyrosinase (*tyr*), a gene required for melanin synthesis. Wild-  
215 type zebrafish embryos were microinjected at the one-cell stage with recombinant Cas9  
216 protein (rCas9) complexed with either synthetic sgRNA (IDT, Alt-R®) or with laboratory-  
217 synthesized IVT sgRNA. Embryos were scored for melanocyte number at 48 hours post  
218 fertilization (hpf) and divided into phenotypic categories representing the degree of gene  
219 editing (Figure 1A). We find that the synthetic sgRNA leads to a significantly increased  
220 fraction of embryos with fewer melanocytes than the IVT sgRNA (Figure 1B). Higher  
221 doses of synthetic sgRNA produce an increase in the fraction of phenotypically edited  
222 embryos. Only synthetic sgRNAs were capable of producing large numbers of embryos  
223 with high phenotype. In order to characterize the molecular alterations of synthetic  
224 sgRNA injected embryos, we performed a clonal analysis. We find that 10/10 clones  
225 from a synthetic sgRNA injected high-phenotype embryo contain indels, as compared  
226 with 7/10 clones from an IVT sgRNA injected high-phenotype embryo; we also observe  
227 significant differences in the indel spectrum (Figure 1C). We found comparable  
228 differences between synthetic and IVT sgRNAs at two additional loci, *slc24a5* and  
229 *slc45a2* (Supplementary Figure 1). Injection of synthetic sgRNAs leads to highly  
230 penetrant phenotypes in F<sub>0</sub> larvae that develop into adults that phenocopy established  
231 germline mutants{Sheets, 2007 #26} (Supplementary Figure 2). We find that pairs of  
232 synthetic sgRNAs are able to induce deletions spanning up to 124kB in genomic DNA  
233 and that the efficiency of generating deletions varies with size (Supplementary Figure  
234 3). Taken together, these data indicate that combined use of rCas9 protein with  
235 synthetic sgRNAs leads to penetrant phenotypes and a broad spectrum of gene-specific  
236 edits.

237



238 To assess the extent of germline transmission of edited alleles, we applied CRISPR-  
239 STAT fluorescence-based genotyping to F<sub>0</sub> founders and progeny{Carrington, 2015  
240 #21}. Sperm samples were collected from F<sub>0</sub> founders injected with rCas9 and synthetic  
241 sgRNA targeting *slc6a15* at the one-cell stage. Results reveal mutant alleles containing  
242 indels as the major peaks, with additional minor peaks corresponding to wild-type and  
243 mutant alleles, indicating a high efficiency of CRISPR-induced mutagenesis in the  
244 germline (Supplementary Figure 4). We identified five distinct alleles that were  
245 transmitted to F<sub>1</sub> progeny (Supplementary Figure 4B-F). The frequencies of observed  
246 CRISPR-induced indels in F<sub>1</sub> progeny were similar to those found in the sperm of the F<sub>0</sub>  
247 founder (Supplementary Figure 4G). These findings are consistent with high levels of  
248 somatic mosaicism and confirm that F<sub>0</sub> sperm samples accurately predict the specific  
249 mutations transmitted to F<sub>1</sub> progeny. These data demonstrate that CRISPR-induced  
250 indels created with synthetic sgRNAs are found in the germline of founders and are  
251 efficiently transmitted to F<sub>1</sub> progeny.

252

### 253 **A genetic assay for homology-directed repair**

254

255 To develop a quantitative assay for optimizing HDR in zebrafish, we sought to target a  
256 locus that could provide phenotypic and molecular data on allele conversion. We initially  
257 examined the widely used *mitfa(w2)* mutant, which lacks melanocytes{Lister, 1999 #27}.  
258 Unexpectedly, injection of rCas9 complexed with a synthetic sgRNA targeting the  
259 mutation site in *w2* resulted in restoration of pigmented melanocytes (Supplementary  
260 Figure 5). We presume that indels caused by targeting the *mitfa(w2)* mutation site  
261 (Q113Stop) lead to in-frame deletions and restore protein function since this region of  
262 the protein is relatively unstructured. We next examined the *mitfa(b692)* mutant, which  
263 lacks melanocytes and harbors a mutation leading to a Ile215Ser substitution{Lister,  
264 2001 #28}. We find that a synthetic sgRNA targeting the *mitfa(b692)* mutation site does  
265 not restore pigmented melanocytes (Supplementary Figure 5). Therefore, we used  
266 *mitfa(b692)* to develop a quantitative phenotypic and molecular assay for optimizing  
267 HDR.

268

269 Using the b692-HDR assay we examined a range of synthetic templates to optimize  
270 HDR efficiency. *mitfa*(b692) embryos were microinjected with rCas9, synthetic sgRNA,  
271 and synthetic DNA templates designed to restore the wild-type *mitfa* sequence and  
272 gene function. Microinjected embryos were scored at 48hpf for phenotypic evidence of  
273 melanocytes, indicative of allele conversion and *mitfa* function (Figure 2A). Melanocytes  
274 were not identified in uninjected embryos or in embryos injected with non-targeting  
275 sgRNA. HDR templates were designed to feature multiple barcoded nucleotides and  
276 mutated sgRNA recognition sequence, enabling unambiguous detection by sequencing  
277 and prevention of re-cleavage by rCas9. We found that a 951bp, double-stranded linear  
278 DNA template with an asymmetric sgRNA site located at the 3' end leads to a  
279 reproducible 9% rate of phenotypic rescue in *mitfa*(b692) embryos (Figure 2B).  
280 Melanocyte-positive embryos were subject to allele-specific PCR and Sanger  
281 sequencing to confirm precise HDR (Figure 2C-D).

282

283 We examined DNA templates that differ in length, single vs. double stranded DNA,  
284 linear vs. circular templates, and the symmetry of the sgRNA position within the  
285 template (Figure 2E). We find that both longer (2kB) and shorter (318bp, 76bp) DNA  
286 templates led to a decrease in HDR efficiency. Asymmetric positioning of sgRNA sites  
287 led to higher efficiency than symmetric positioning. We tested an IVT sgRNA in  
288 combination with rCas9 and the optimal 951bp linear dsDNA template and found no  
289 appreciable HDR. Our data indicates that HDR efficiency is maximal with dsDNA  
290 templates and synthetic sgRNA and that HDR is sensitive to template length and  
291 sgRNA site symmetry within the HDR template.

292

293 Using the b692 assay we examined multiple reagents and conditions reported to  
294 improve HDR efficiency in other model systems (Figure 2E). The addition of a second  
295 sgRNA site in the optimal 951bp template reduced HDR efficiency to < 1%. We cloned  
296 the 951bp template into a TopoTA plasmid vector and microinjected a circular plasmid  
297 into zebrafish. This plasmid-based template also failed to lead to measurable HDR in

298 b692 embryos. In light of prior studies reporting increased HDR efficiency with the use  
299 of catalytically-mutated Cas9 (nickase Cas9) {Richardson, 2016 #29}, we altered the  
300 951bp DNA template to allow us to test this approach. Microinjection of paired sgRNAs  
301 and recombinant nickase Cas9 failed to lead to measurable HDR in b692 embryos.  
302 Based on reports that small molecule inhibitors of poly (ADP-ribose) polymerase  
303 (PARP) stimulate HDR efficiency {Anantha, 2017 #32}, we performed microinjection of  
304 the 951bp template and a PARP inhibitor, but did not observe any measurable HDR  
305 efficiency. Finally, we examined the effect of cleaving the ends of the linear 951bp  
306 template with a restriction enzyme (ISce-I), but we did not observe measurable HDR  
307 under this condition.

308

### 309 **Melanocyte restoration in b692 assay correlates with molecular efficiency**

310

311 Using the b692-HDR assay we sought to measure the molecular efficiency of genome  
312 editing and correlate DNA template integration with melanocyte number. To this end, we  
313 performed single-cell injections in a large cohort of b692 embryos using the optimized  
314 reagents described: rCas9, synthetic b692 sgRNA, and 951bp linear dsDNA template.  
315 Embryos were scored for the presence of melanocytes at 48hpf and binned by  
316 phenotype into four categories: high-, medium-, low-, and no-editing. Uninjected  
317 embryos were included as a negative control. Genomic DNA was extracted from pools  
318 of five embryos in each category, and exon 7 was amplified by PCR. Amplicons from  
319 each group were subjected to next-generation sequencing. We find that that the  
320 efficiency of genome editing as determined by next-generation sequencing correlates  
321 with phenotype in b692 edited embryos. In high-rescued embryos, we find that 17% of  
322 reads (106428 edited/641281 total) harbor an edited codon restoring Ser215 to Ile,  
323 consistent with template integration. Analysis of aligned reads at exon 7 reveals the  
324 uniform presence of barcoded nucleotides from the HDR template across the sgRNA  
325 target site (Figure 3A). Phenotypic rescue in medium and low categories revealed  
326 molecular efficiency of approximately 3% (14810/575344 and 17566/622068 reads,  
327 respectively). Injected embryos with no phenotypic evidence of HDR had molecular

328 efficiency of <0.3%. Alignment of reads demonstrates a mutually exclusive pattern of  
329 either HDR with template integration or indels at the sgRNA site (Figure 3A), consistent  
330 with highly efficient dsDNA cleavage. We analyzed the molecular efficiency across all  
331 phenotypes and plotted the fraction of reads harboring barcoded nucleotides from the  
332 HDR template (Figure 3B-E). These data confirm the sensitivity of the b692-HDR assay  
333 to read out the molecular efficiency of HDR in vivo.

334

### 335 **Genome editing using synthetic reagents leads to efficient fluorophore knock-in** 336 **and germline transmission**

337

338 To determine the feasibility of using synthetic reagents to knock-in a fluorophore by  
339 HDR, we targeted *tyrp1b*, a melanocyte-specific gene. Using albino embryos  
340 (pigmentless due to a null mutation in *slc45a2*) we performed microinjection of rCas9  
341 with a synthetic sgRNA and a synthetic linear dsDNA template designed to knock EGFP  
342 in frame with the terminal *tyrp1b* exon (Figure 4A). We identified 7/153 (5%) embryos  
343 with EGFP-positive melanocytes at 48hpf (Figure 4B). Allele-specific PCR was  
344 performed from injected embryos with EGFP-positive melanocytes (Figure 4C). Sanger  
345 sequencing revealed the presence of multiple barcoded nucleotides encoded by the  
346 HDR template, consistent with template integration (Figures 4D). Confocal imaging  
347 revealed the presence of an EGFP-positive melanocyte with characteristic stellate  
348 morphology (Figure 4D).

349

350 To determine the generalizability of this approach across multiple loci, we targeted  
351 *h3f3a*, one of several genes encoding histone H3.3. We designed a linear dsDNA  
352 template to knock EGFP in frame with *h3f3a*, creating a C-terminal fusion (Figure 4F).  
353 We microinjected rCas9 with a synthetic sgRNA targeting *h3f3a* and a synthetic dsDNA  
354 template into wild type embryos. We identified 12/152 (8%) embryos with EGFP-positive  
355 cells at 48hpf (Figure 4G). Allele-specific PCR and Sanger sequencing performed on  
356 EGFP positive embryos revealed precise template integration (Figure 4H,I). Confocal  
357 imaging revealed the presence of cells with a nuclear EGFP-positive signal

358 characteristic of chromatin (Figure 6J). We raised mosaic F<sub>0</sub> embryos to adulthood and  
359 assayed the rate of germline transmission. Of the 14 adult fish that mated, 2 (14%)  
360 produced EGFP<sup>+</sup> F<sub>1</sub> embryos (Figure 4K,L). Taken together, these data demonstrate  
361 the ability of synthetic sgRNAs and dsDNA templates to knock-in allele-specific  
362 fluorophores at several genomic loci and to transmit these edited alleles through the  
363 germline.

364  
365 To expand the applications of genome editing using synthetic DNA templates, we  
366 targeted the liver-specific gene *fabp10a* using a linear dsDNA template that knocks in  
367 mScarlet and bacterial nitroreductase (*ntr*) to facilitate hepatocyte ablation studies  
368 (Figure 5A). The zebrafish liver is capable of regeneration after injury {Cox, 2015 #40},  
369 and expression of *ntr* has been used in combination with metronidazole (Mtz) to cause  
370 cellular injury {Curado, 2008 #41}. We injected embryos with rCas9, sgRNA targeting  
371 *fabp10a*, and the HDR template and raised mScarlet<sup>+</sup> F<sub>0</sub> embryos to adulthood. Of  
372 adult fish that mated, 2/8 (25%) produced mScarlet<sup>+</sup> F<sub>1</sub> embryos. We characterized the  
373 recovered *fabp10a* allele in F<sub>1</sub> animals using allele-specific PCR and confirmed  
374 integration of the template in mScarlet<sup>+</sup> embryos (Figure 5B). Molecular analysis  
375 indicated that the 5' end of the HDR template resulted in an in-frame fusion between  
376 exon 4 and mScarlet. At the 3' end of the recovered allele, we identified a fragment of  
377 exon 4 distal to the sgRNA recognition sequence, likely resulting from ligation to the  
378 template. We treated transgenic F<sub>1</sub> embryos with Mtz to examine whether an *fabp10a-ntr*  
379 fusion was functional and could leave to liver-specific cytotoxicity. Exposing *fabp10a*-  
380 mScarlet-NTR larvae to Mtz from 96–120 hpf resulted in a dramatic reduction in the  
381 mScarlet fluorescent signal, signifying hepatocyte ablation without obvious damage to  
382 other tissues (Figure 5C,D). Remnants of the ablated hepatocytes were observed  
383 circulating in the vasculature. After a recovery period of 48 hours in the absence of Mtz,  
384 mScarlet signal was observed in the liver of the Mtz-treated larvae, consistent with liver  
385 regeneration (Figure 5E,F).

386

387 **DISCUSSION**

388

389 Here we describe the development and application of genome editing in zebrafish using  
390 synthetic reagents. We demonstrate that the combined use of synthetic sgRNAs with  
391 rCas9 protein leads to highly efficient indels. The improved efficiency of commercial  
392 sgRNAs may result from chemical modifications that protect sgRNAs from degradation.  
393 In order to optimize the efficiency of homology-directed repair we developed a genetic  
394 assay using *mitfa*(b692) mutant zebrafish. Our data demonstrate that the b692-HDR  
395 assay permits correlation between phenotype and HDR allele conversion (genotype).  
396 Using this assay, we systematically tested multiple template designs to determine which  
397 parameters are optimal for efficient knock-in by HDR. We find that the optimal template  
398 is a linear, dsDNA template with an asymmetric sgRNA site. Using these design  
399 principles, we knock-in fluorophores at *tyrp1b*, *h3f3a* and *fabp10a*; we achieved  
400 germline transmission rates of 14–25% at two loci. At *fabp10a* the HDR template  
401 included an *ntr* cassette to facilitate lineage ablation studies, and application of  
402 metronidazole resulted in hepatocyte ablation in transgenic F<sub>1</sub> larvae. These germline  
403 transmission rates are among the highest reported for knock-in of gene cassettes in  
404 zebrafish, and this is the first report of CRISPR-mediated *ntr* knock-in and lineage  
405 ablation.

406

407 A total synthetic approach has the unique advantage that sgRNA and HDR templates  
408 can be designed in silico and commercially manufactured in a short time frame. Design  
409 and precision genome editing with a synthetic dsDNA template can be performed within  
410 2–3 weeks. The use of synthetic reagents may reduce experimental variability between  
411 labs. The use of sgRNAs produced by commercial solid phase synthesis raises the  
412 possibility of incorporating degeneracy in the sgRNA sequence to permit a single  
413 sgRNA to target multiple related genes. The synthesis of linear dsDNA templates may  
414 allow investigators to rapidly test sequence requirements for HDR. We unexpectedly  
415 found significant differences in HDR efficiency between templates with minor design  
416 differences. These observations suggest that empiric optimization of donor templates  
417 may be required to achieve knock-in at some loci. As new recombinant Cas9 proteins

418 become available, the ability to perform base editing and other enzyme modifications  
419 may be possible. Finally, the b692-HDR assay may be used as a screening platform to  
420 identify chemical and genetic modifiers of HDR efficiency to make further improvements  
421 in efficiency.

422  
423 The use of CRISPR/Cas9 to generate loss of function mutations in zebrafish and other  
424 model organisms makes it a uniquely valuable resource for forward genetics. To our  
425 knowledge, this is the first study to develop a genetic assay for HDR in zebrafish and to  
426 optimize HDR templates. Our studies offer insight into the relative efficiency of HDR and  
427 provide investigators with a workflow for generating knock-in alleles. Our approach to  
428 genome editing should allow investigators to pursue a broad range of in vivo  
429 applications, including tissue-restricted lineage ablation, fluorophore and epitope knock-  
430 in, and generation of conditional alleles. Future improvements in HDR efficiency may  
431 occur with new variations in Cas9 protein and molecular and chemical tools to further  
432 enhance the efficiency of homology directed repair.

433

434

## 435 **ACKNOWLEDGMENT**

436

437 We are grateful to members of the Houvras laboratory for critical discussion and  
438 manuscript review. We thank the Weill Cornell Genomics Resources Core Facility for  
439 next generation sequencing.

440

## 441 **FUNDING**

442

443 This work was supported by the Department of Surgery, Weill Cornell Medical College  
444 (YH); National Institutes of Health/National Cancer Institute pre-doctoral fellowship  
445 F31CA192813 (SED); National Institutes of Health/National Cancer Institute pre-  
446 doctoral fellowship F31CA213997 (RM); the Medical Scientist Training Program of  
447 General Medical Sciences of the NIH (T32GM007739) to the Weill

448 Cornell/Rockefeller/Sloan-Kettering Tri-Institutional MD-PhD Program (RM); the  
449 National Center for Advancing Translational Sciences of the NIH (TL1-TR000459)  
450 (CKG); the American Liver Foundation (PJW); the National Institutes of Health post-  
451 doctoral fellowship F32AA025271 (PJW); the National Institutes of Health  
452 R01DK090311 (WG), R01DK105198 (WG), R24OD017870 (WG), and the Claudia  
453 Adams Barr Program in Innovative Basic Cancer Research (WG). Wolfram Goessling is  
454 a Pew Scholar in the Biomedical Sciences. The content is solely the responsibility of the  
455 authors and does not necessarily represent the official views of the National Institutes of  
456 Health.

457

#### 458 **CONFLICT OF INTEREST**

459 The authors declare no competing financial interests.

460

#### 461 **REFERENCES**

- 462 1. Jao,L.-E., Wente,S.R. and Chen,W. (2013) Efficient multiplex biallelic zebrafish  
463 genome editing using a CRISPR nuclease system. *Proc. Natl. Acad. Sci. U. S. A.*,  
464 **110**, 13904–9.
- 465 2. Shah,A.N., Davey,C.F., Whitebirch,A.C., Miller,A.C. and Moens,C.B. (2015) Rapid  
466 reverse genetic screening using CRISPR in zebrafish. *Nat. Methods*, **12**, 535–540.
- 467 3. Auer,T.O., Duroure,K., Cian,A. De, Concordet,J. and Bene,F. Del (2014) Highly  
468 efficient CRISPR / Cas9-mediated knock-in in zebrafish by homology-independent  
469 DNA repair. *Genome Res.*, **24**, 142–153.
- 470 4. Irion,U., Krauss,J. and Nusslein-Volhard,C. (2014) Precise and efficient genome  
471 editing in zebrafish using the CRISPR/Cas9 system. *Development*,  
472 10.1242/dev.115584.
- 473 5. Hoshijima,K., Juryneć,M.J. and Grunwald,D.J. (2016) Precise Editing of the Zebrafish  
474 Genome Made Simple and Efficient. *Dev. Cell*, **36**, 654–667.
- 475 6. Hwang,W.Y., Fu,Y., Reyon,D., Maeder,M.L., Kaini,P., Sander,J.D., Joung,J.K.,  
476 Peterson,R.T. and Yeh,J.R.J. (2013) Heritable and Precise Zebrafish Genome  
477 Editing Using a CRISPR-Cas System. *PLoS One*, **8**, 1–9.
- 478 7. Kimura,Y., Hisano,Y., Kawahara,A. and Higashijima,S.I. (2014) Efficient generation of  
479 knock-in transgenic zebrafish carrying reporter/driver genes by CRISPR/Cas9-  
480 mediated genome engineering. *Sci. Rep.*, **4**, 1–7.
- 481 8. Hendel,A., Bak,R.O., Clark,J.T., Kennedy,A.B., Ryan,D.E., Roy,S., Steinfeld,I.,  
482 Lunstad,B.D., Kaiser,R.J., Wilkens,A.B., *et al.* (2015) Chemically modified guide  
483 RNAs enhance CRISPR-Cas genome editing in human primary cells. *Nat.*  
484 *Biotechnol.*, **33**, 985–989.
- 485 9. Rahdar,M., McMahon,M.A., Prakash,T.P., Swayze,E.E., Bennett,C.F. and  
486 Cleveland,D.W. (2015) Synthetic CRISPR RNA-Cas9-guided genome editing in  
487 human cells. *Proc. Natl. Acad. Sci.*, **112**, E7110-7117.



- 488 10. Chari,R., Mali,P., Moosburner,M. and Church,G.M. (2015) Unraveling CRISPR-  
489 Cas9 genome engineering parameters via a library-on-library approach. *Nat.*  
490 *Methods*, **12**, 1–7.
- 491 11. Chari,R., Yeo,N.C., Chavez,A. and Church,G.M. (2017) SgRNA Scorer 2.0: A  
492 Species-Independent Model to Predict CRISPR/Cas9 Activity. *ACS Synth. Biol.*, **6**,  
493 902–904.
- 494 12. Perez,A.R., Pritykin,Y., Vidigal,J.A., Chhangawala,S., Zamparo,L., Leslie,C.S. and  
495 Ventura,A. (2017) GuideScan software for improved single and paired CRISPR  
496 guide RNA design. *Nat. Biotechnol.*, **35**, 347–349.
- 497 13. Varshney,G.K., Zhang,S., Pei,W., Adomako-Ankomah,A., Fohntung,J., Schaffer,K.,  
498 Carrington,B., Maskeri,A., Slevin,C., Wolfsberg,T., *et al.* (2016) CRISPRz: A  
499 database of zebrafish validated sgRNAs. *Nucleic Acids Res.*, **44**, D822–D826.
- 500 14. Lindsay,H., Burger,A., Biyong,B., Felker,A., Hess,C., Zaugg,J., Chiavacci,E.,  
501 Anders,C., Jinek,M., Mosimann,C., *et al.* (2016) CrispRVariants charts the mutation  
502 spectrum of genome engineering experiments. *Nat. Biotechnol.*, **34**, 701–702.
- 503 15. Draper,B.W. and Moens,C.B. (2009) A High-Throughput Method For Zebrafish  
504 Sperm Cryopreservation and *In Vitro* Fertilization. *J. Vis. Exp.*,  
505 10.3791/1395.
- 506 16. Meeker,N.D., Hutchinson,S.A., Ho,L. and Trede,N.S. (2007) Method for isolation of  
507 PCR-ready genomic DNA from zebrafish tissues. *Biotechniques*, **43**, 610–614.
- 508 17. Carrington,B., Varshney,G.K., Burgess,S.M. and Sood,R. (2015) CRISPR-STAT: An  
509 easy and reliable PCR-based method to evaluate target-specific sgRNA activity.  
510 *Nucleic Acids Res.*, **43**, 1–8.
- 511 18. Holleley,C.E. and Geerts,P.G. (2009) Multiplex Manager 1.0: A cross-platform  
512 computer program that plans and optimizes multiplex PCR. *Biotechniques*, **46**,  
513 511–517.
- 514 19. Dobin,A., Davis,C.A., Schlesinger,F., Drenkow,J., Zaleski,C., Jha,S., Batut,P.,  
515 Chaisson,M. and Gingeras,T.R. (2013) STAR: Ultrafast universal RNA-seq aligner.  
516 *Bioinformatics*, **29**, 15–21.
- 517 20. Thorvaldsdóttir,H., Robinson,J.T. and Mesirov,J.P. (2013) Integrative Genomics  
518 Viewer (IGV): High-performance genomics data visualization and exploration. *Brief.*  
519 *Bioinform.*, **14**, 178–192.
- 520 21. Robinson,J.T., Thorvaldsdottir,H., Winckler,W., Guttman,M., Lander,E.S., Getz,G.  
521 and Mesirov,J.P. (2011) Integrative Genomics Viewer. *Nat. Biotechnol.*, **29**, 24–26.
- 522 22. Sheets,L., Ransom,D.G., Mellgren,E.M., Johnson,S.L. and Schnapp,B.J. (2007)  
523 Zebrafish Melanophilin Facilitates Melanosome Dispersion by Regulating Dynein.  
524 *Curr. Biol.*, **17**, 1721–1734.
- 525 23. Lister,J., Robertson,C., Lepage,T., Johnson,S. and Raible,D. (1999) Nacre Encodes  
526 a Zebrafish Microphthalmia-Related Protein That Regulates Neural-Crest-Derived  
527 Pigment Cell Fate. *Development*, **126**, 3757–3767.
- 528 24. Lister,J.A., Close,J. and Raible,D.W. (2001) Duplicate mitf genes in zebrafish:  
529 Complementary expression and conservation of melanogenic potential. *Dev. Biol.*,  
530 **237**, 333–344.
- 531 25. Richardson,C.D., Ray,G.J., DeWitt,M.A., Curie,G.L. and Corn,J.E. (2016)

- 532 Enhancing homology-directed genome editing by catalytically active and inactive  
533 CRISPR-Cas9 using asymmetric donor DNA. *Nat. Biotechnol.*, **34**, 339–344.
- 534 26. Varshney,G.K., Pei,W., Lafave,M.C., Idol,J., Xu,L., Gallardo,V., Carrington,B.,  
535 Bishop,K., Jones,M., Li,M., *et al.* (2015) High-throughput gene targeting and  
536 phenotyping in zebrafish using CRISPR / Cas9. *Genome Res.*, **25**, 1–13.
- 537 27. Quadros,R.M., Miura,H., Harms,D.W., Akatsuka,H., Sato,T., Aida,T., Redder,R.,  
538 Richardson,G.P., Inagaki,Y., Sakai,D., *et al.* (2017) Easi-CRISPR: A robust method  
539 for one-step generation of mice carrying conditional and insertion alleles using long  
540 ssDNA donors and CRISPR ribonucleoproteins. *Genome Biol.*, **18**, 1–15.
- 541 28. Anantha,R.W., Simhadri,S., Foo,T.K., Miao,S., Liu,J., Shen,Z., Ganesan,S. and  
542 Xia,B. (2017) Functional and mutational landscapes of BRCA1 for homology-  
543 directed repair and therapy resistance. *Elife*, **6**, 1–21.
- 544 29. Westerfield M. 2007. The Zebrafish Book a Guide for the Laboratory Use of  
545 Zebrafish (*Danio Rerio*). 5th Edition. Eugene: University of Oregon Press.  
546

547 **FIGURE LEGENDS**

548

549 **Figure 1.** Synthetic sgRNAs outperform laboratory synthesized *in vitro* transcribed  
550 sgRNAs. **(A)** Dose-response comparison of editing in embryos injected with rCas9 and  
551 either an *in vitro* synthesized or synthetic sgRNA targeting *tyr*. Embryos were scored for  
552 melanocyte dropout at 48hpf and binned into 4 categories. The percentage of embryos  
553 in each condition is plotted. At the 1000pg sgRNA/2000pg rCas9 dose, there is a  
554 statistically significant increase in the editing observed with the synthetic sgRNA  
555 ( $p < 0.001$ , Chi-square). **(B)** Light microscopic images of representative embryos in  
556 each category. **(C)** CrisprVariants {Lindsay, 2016 #18} plot of indels in clones isolated  
557 from embryos injected with either synthetic or *in vitro* transcribed sgRNAs. 10/10 clones  
558 isolated from individual embryos injected with synthetic from sgRNAs contained indels  
559 and 7/10 clones isolated from embryos injected with IVT sgRNAs contained indels.

560

561 **Figure 2.** A genetic assay for optimizing homology-directed repair using b692 mutant  
562 zebrafish. **(A)** *mitfa*(b692) embryos uninjected (top), injected with rCas9, 951bp DNA  
563 template, and non-targeting sgRNA (middle) or *mitfa* sgRNA (bottom). All embryos  
564 shown at 48hpf. **(B)** Schematic depicting *mitfa* gene structure and location of the  
565 mutation in exon 7 in b692 mutants. The sgRNA location is indicated. Primers used for  
566 allele-specific PCR are displayed as orange arrows. A linear 951bp dsDNA template  
567 encodes a wild-type Ile codon at position 215 and additional nucleotide changes to  
568 prevent re-cleavage at the sgRNA recognition site (red). **(C)** Allele-specific PCR was  
569 performed on rescued embryos after microinjection with 951bp template and compared  
570 with uninjected embryos. **(D)** Sanger sequencing results of allele-specific PCR products  
571 from a phenotypically rescued embryo. The sequence read spans the template-genome  
572 junction and includes template specific barcoded nucleotides. **(E)** Chart depicting  
573 attributes of DNA template (left), a description of the template (middle) and observed  
574 rate of rescue in the b692-HDR assay (right).

575

576 **Figure 3.** Quantitative assessment of genome editing efficiency by next-generation  
577 sequencing. **(A)** Alignment of next generation sequencing reads from b692 genome  
578 edited embryos from the high rescue phenotype. Exon 7 of *mitfa* is displayed. The  
579 sgRNA sequence is highlighted in yellow. b692 mutants have a T>G mutation leading to  
580 an isoleucine to serine substitution at codon 215(\*). The 951bp dsDNA template  
581 restores the wild-type isoleucine codon (ATC) and encodes nine additional barcoded  
582 nucleotides as indicated. Indels in sequencing reads are represented as gapped regions  
583 in black. **(B-E)** The fraction of reads at each barcoded nucleotide in the HDR template is  
584 plotted for each phenotype category.

585

586 **Figure 4.** Genome editing leads to precise fluorophore knock-in. **(A)** Schematic  
587 depicting *tyrp1b* locus. A linear, dsDNA template designed to lead to an in-frame EGFP  
588 knock-in is shown. **(B)** albino(b4) embryo injected with rCas9, *tyrp1b* synthetic sgRNA,  
589 and dsDNA template is photographed with light (top panel) or fluorescence (bottom  
590 panel) microscopy at 48hpf. **(C)** Allele-specific PCR was performed on uninjected or

591 HDR edited/GFP+ embryos at 48hpf. Only HDR-edited/EGFP-positive embryos had a  
592 PCR amplicon. (D) Sanger sequencing from allele-specific PCR to detect template  
593 integration. The sequence was aligned to reference (top). Barcoded nucleotides at the  
594 sgRNA binding site consistent with template integration were identified. A representative  
595 chromatogram is shown. (E) Confocal imaging reveals the presence of stellate EGFP-  
596 positive melanocytes. (F) Schematic depicting *h3f3a* locus. A linear, dsDNA template  
597 designed to lead to an in-frame EGFP knock-in is shown. (G) Wild-type embryo injected  
598 with rCas9, *h3f3a* sgRNA, and dsDNA template is photographed with light (top panel) or  
599 fluorescence (bottom panel) microscopy (48hpf). (H) Allele-specific PCR was performed  
600 on uninjected or HDR edited/GFP+ embryos at 48hpf. Only HDR-edited/EGFP-positive  
601 embryos had a PCR amplicon. (I) Sanger sequencing was performed from allele-  
602 specific PCR to detect template integration. The sequence was aligned to reference  
603 (top). Barcoded nucleotides at the sgRNA binding site, consistent with template  
604 integration were identified. A representative chromatogram is shown. (J) Confocal  
605 imaging reveals the presence of an EGFP-positive nuclei. (K-L) Immunofluorescent  
606 images of F1 progeny showing transmission of EGFP from *h3f3a*-EGFP founder.  
607

608 **Figure 5.** Knock-in of a synthetic dsDNA template encoding a fluorophore and bacterial  
609 nitroreductase enables tissue-specific ablation. (A) Schematic outlining HDR template  
610 design at the *fabp10a* locus. A 2.0kB template was designed to insert mScarlet-NTR as  
611 a C-terminal fusion to the *fabp10a* gene, which has hepatocyte-specific expression. The  
612 recovered allele from F<sub>1</sub> progeny confirms integration of mScarlet after the last coding  
613 exon of *fabp10a*. (B) Allele-specific PCR was performed to confirm integration of the  
614 template in mScarlet+ (mS+) embryos. (C-F) Mtz exposure induced hepatocyte injury in  
615 *fabp10a*-mScarlet-NTR larvae. (C) Confocal imaging revealed loss of fluorescence in  
616 the liver (outlined) of Mtz-treated but not DMSO-treated larvae. Remnants of ablated  
617 hepatocytes were found distributed throughout the vasculature (arrowhead). (D)  
618 Confocal imaging of liver in DMSO- and Mtz-treated larvae after injury. (E) At 48 hours  
619 post injury (hpi), mScarlet signal was observed in the liver (outlined) of the Mtz-treated  
620 larvae, demonstrating liver regeneration. (F) Confocal imaging of liver in DMSO and Mtz  
621 treated larvae at 48 hpi. Scale bars are 200 μm (C,E) and 30 μm (D,F).  
622

623 **Supplementary Figure 1.** Synthetic sgRNAs outperform *in vitro* synthesized sgRNA in  
624 targeting *slc25a2* (golden) and *slc45a2* (albino). (A) Comparison of Alt-R® synthetic  
625 sgRNA preparation and *in vitro* synthesis of sgRNAs. Left, Alt-R® synthetic sgRNAs are  
626 prepared by duplexing a gene specific crRNA with a common tracrRNA. Right, IVT  
627 sgRNAs are transcribed from a DNA template using RNA polymerase and purified. Both  
628 sgRNAs are used with rCas9 and microinjected into embryos at the one-cell stage. (B)  
629 Light microscopic images of representative embryos in each phenotypic category. (C)  
630 Dose-response comparison of editing in embryos injected with rCas9 and either an *in*  
631 *vitro* synthesized or synthetic sgRNA targeting *slc25a2*. Embryos were scored for  
632 melanocyte dropout at 48hpf and binned into 4 categories. The percentage of embryos  
633 in each condition is plotted. (D) Embryos injected with either IVT or synthetic sgRNA  
634 targeting *slc45a2* (albino). Representative embryos are shown. IVT sgRNA was

635 ineffective in inducing a mutant phenotype. Synthetic sgRNA induced a mutant  
636 phenotype in virtually all injected embryos. (E) A clonal analysis was performed and  
637 analyzed using CrisprVariants. IVT injected embryos showed no evidence of indels  
638 (0/10 clones) and a synthetic sgRNA induced indels in 10/10 clones.

639

640 **Supplementary Figure 2.** Synthetic sgRNAs produce highly penetrant phenotypes in  
641 F<sub>0</sub> injected animals. Wild-type (AB) embryos were injected with rCas9 and synthetic  
642 sgRNA targeting *mlpha*. Uninjected larval animals (top) have normal stripe pattern.  
643 Juvenile zebrafish (7 weeks post fertilization) injected with rCas9 and a synthetic  
644 sgRNA targeting *mlpha* show reduced pigmentation and phenocopies an established  
645 mutant.

646

647 **Supplementary Figure 3.** Synthetic sgRNA pairs induce deletions in genomic DNA. (A)  
648 Schematic of a 126kB genomic region targeted for deletions. Guide locations are  
649 marked in purple, and primers used for PCR are displayed as orange arrows. Guide  
650 pairs were co-injected into 1-cell stage embryos. (B) Table of predicted PCR product  
651 size after inducing deletions and observed deletion frequency in individual F<sub>0</sub> injected  
652 embryos. (C-F) PCR amplicons from individual embryos were subjected to Sanger  
653 sequencing and analysis. The observed deletion size is indicated.

654

655 **Supplementary Figure 4.** Germline transmission of edited alleles is achieved using  
656 synthetic sgRNAs. (A) Sperm samples were collected from a CRISPR-injected potential  
657 F<sub>0</sub> founder and assayed using CRISPR-STAT fluorescence-based genotyping. (B-F)  
658 CRISPR-STAT results for tail clips from representative F<sub>1</sub> progeny, each carrying one of  
659 the distinct alleles with specific insertions and deletions (del3, del4, del7, del11), as well  
660 as the wild-type (WT) allele, transmitted from the F<sub>0</sub> founder. The number of F<sub>1</sub> offspring  
661 identified with each genotype is identified in the bottom right of each panel. Relative  
662 fluorescence levels (y-axis) are shown against fragment size in base pairs (x-axis) for  
663 each genotyping assay. PCR products consistent with predicted wild type amplicon size  
664 are indicated by red asterisks. (G) Indels in F<sub>0</sub> sperm predict alleles transmitted to the  
665 germline. Percentages shown are calculated as area under the curve for each peak in  
666 the indicated tissue from the F<sub>0</sub> founder. The frequencies of each mutation in the F<sub>1</sub>  
667 progeny were calculated from a total of 17 siblings from a cross between the F<sub>0</sub> male  
668 parent and a WT female.

669 **Supplementary Figure 5.** Comparison of melanocyte phenotypes in *mitfa* mutants after  
670 targeting *mitfa* using CRISPR/Cas9. (A) *mitfa*(w2) embryos were injected with rCas9  
671 and a specific sgRNA near the mutation site. Ten representative embryos at 24hpf are  
672 shown. Melanocyte rescue occurs in a significant fraction of embryos. (B)  
673 CrispRVariants plot from *mitfa*(w2) embryos injected with rCas9 and nacre gRNA. A  
674 majority of embryos harbor indels. (C) *mitfa*(b692) embryos were injected with rCas9  
675 and a synthetic sgRNA near the b692 mutation site (b692 sgRNA). Uninjected wild-type  
676 (AB) embryos (top, left) have pigmented melanocytes at 48hpf. Wild-type embryos  
677 injected with rCas9 and b692 sgRNA (bottom, left) have a highly penetrant loss of  
678 melanocytes. Uninjected *mitfa*(b692) embryos (top, right) lack pigmentation because of

679 the b692 mutation. *mitfa*(b692) embryos injected with rCas9 and the b692 sgRNA  
680 (bottom, right) have no evidence of melanocyte rescue.

681

682 **Supplementary Table 1.** sgRNA sequences. Sequences of sgRNA sequences are  
683 noted with the PAM sequence in parentheses.

684

685 **Supplementary Table 2.** Primer sequences are listed for PCR reactions noted in the  
686 text.

687

688

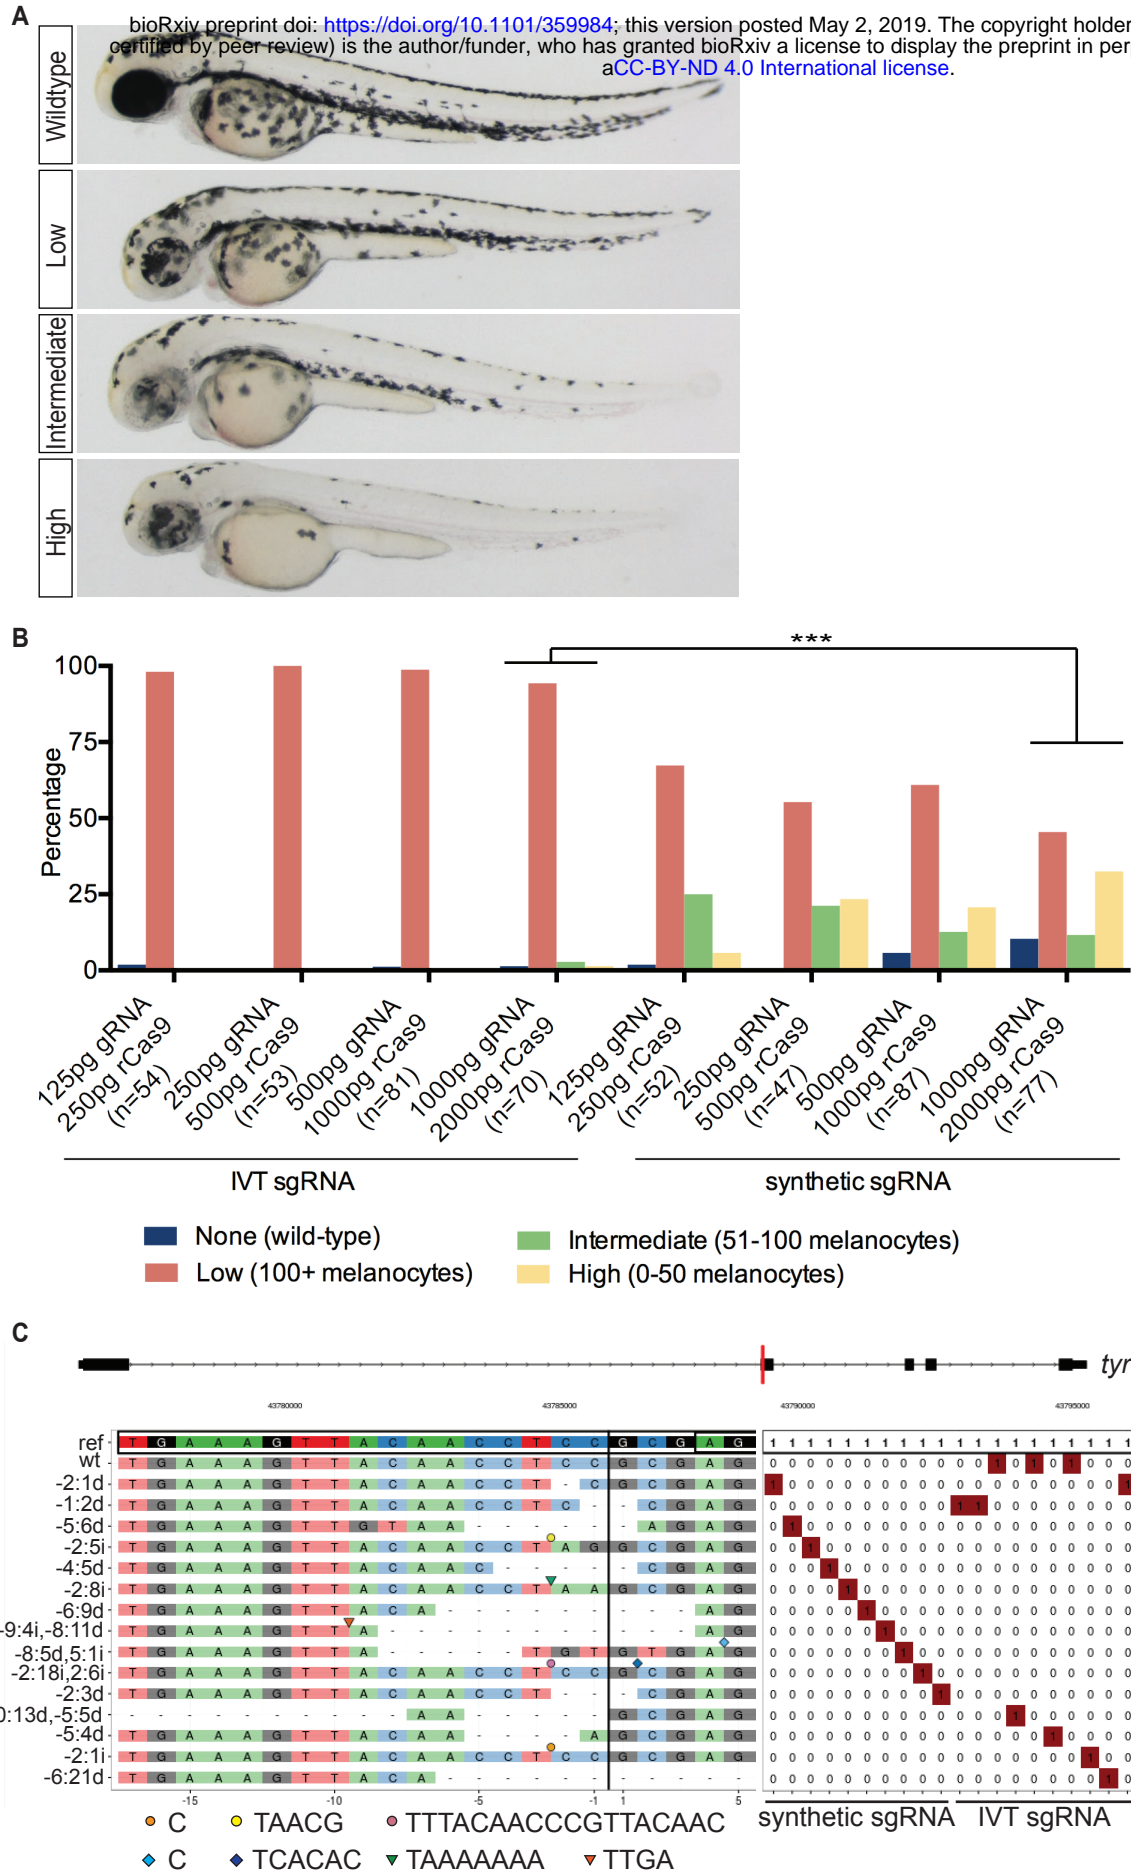

Figure 1

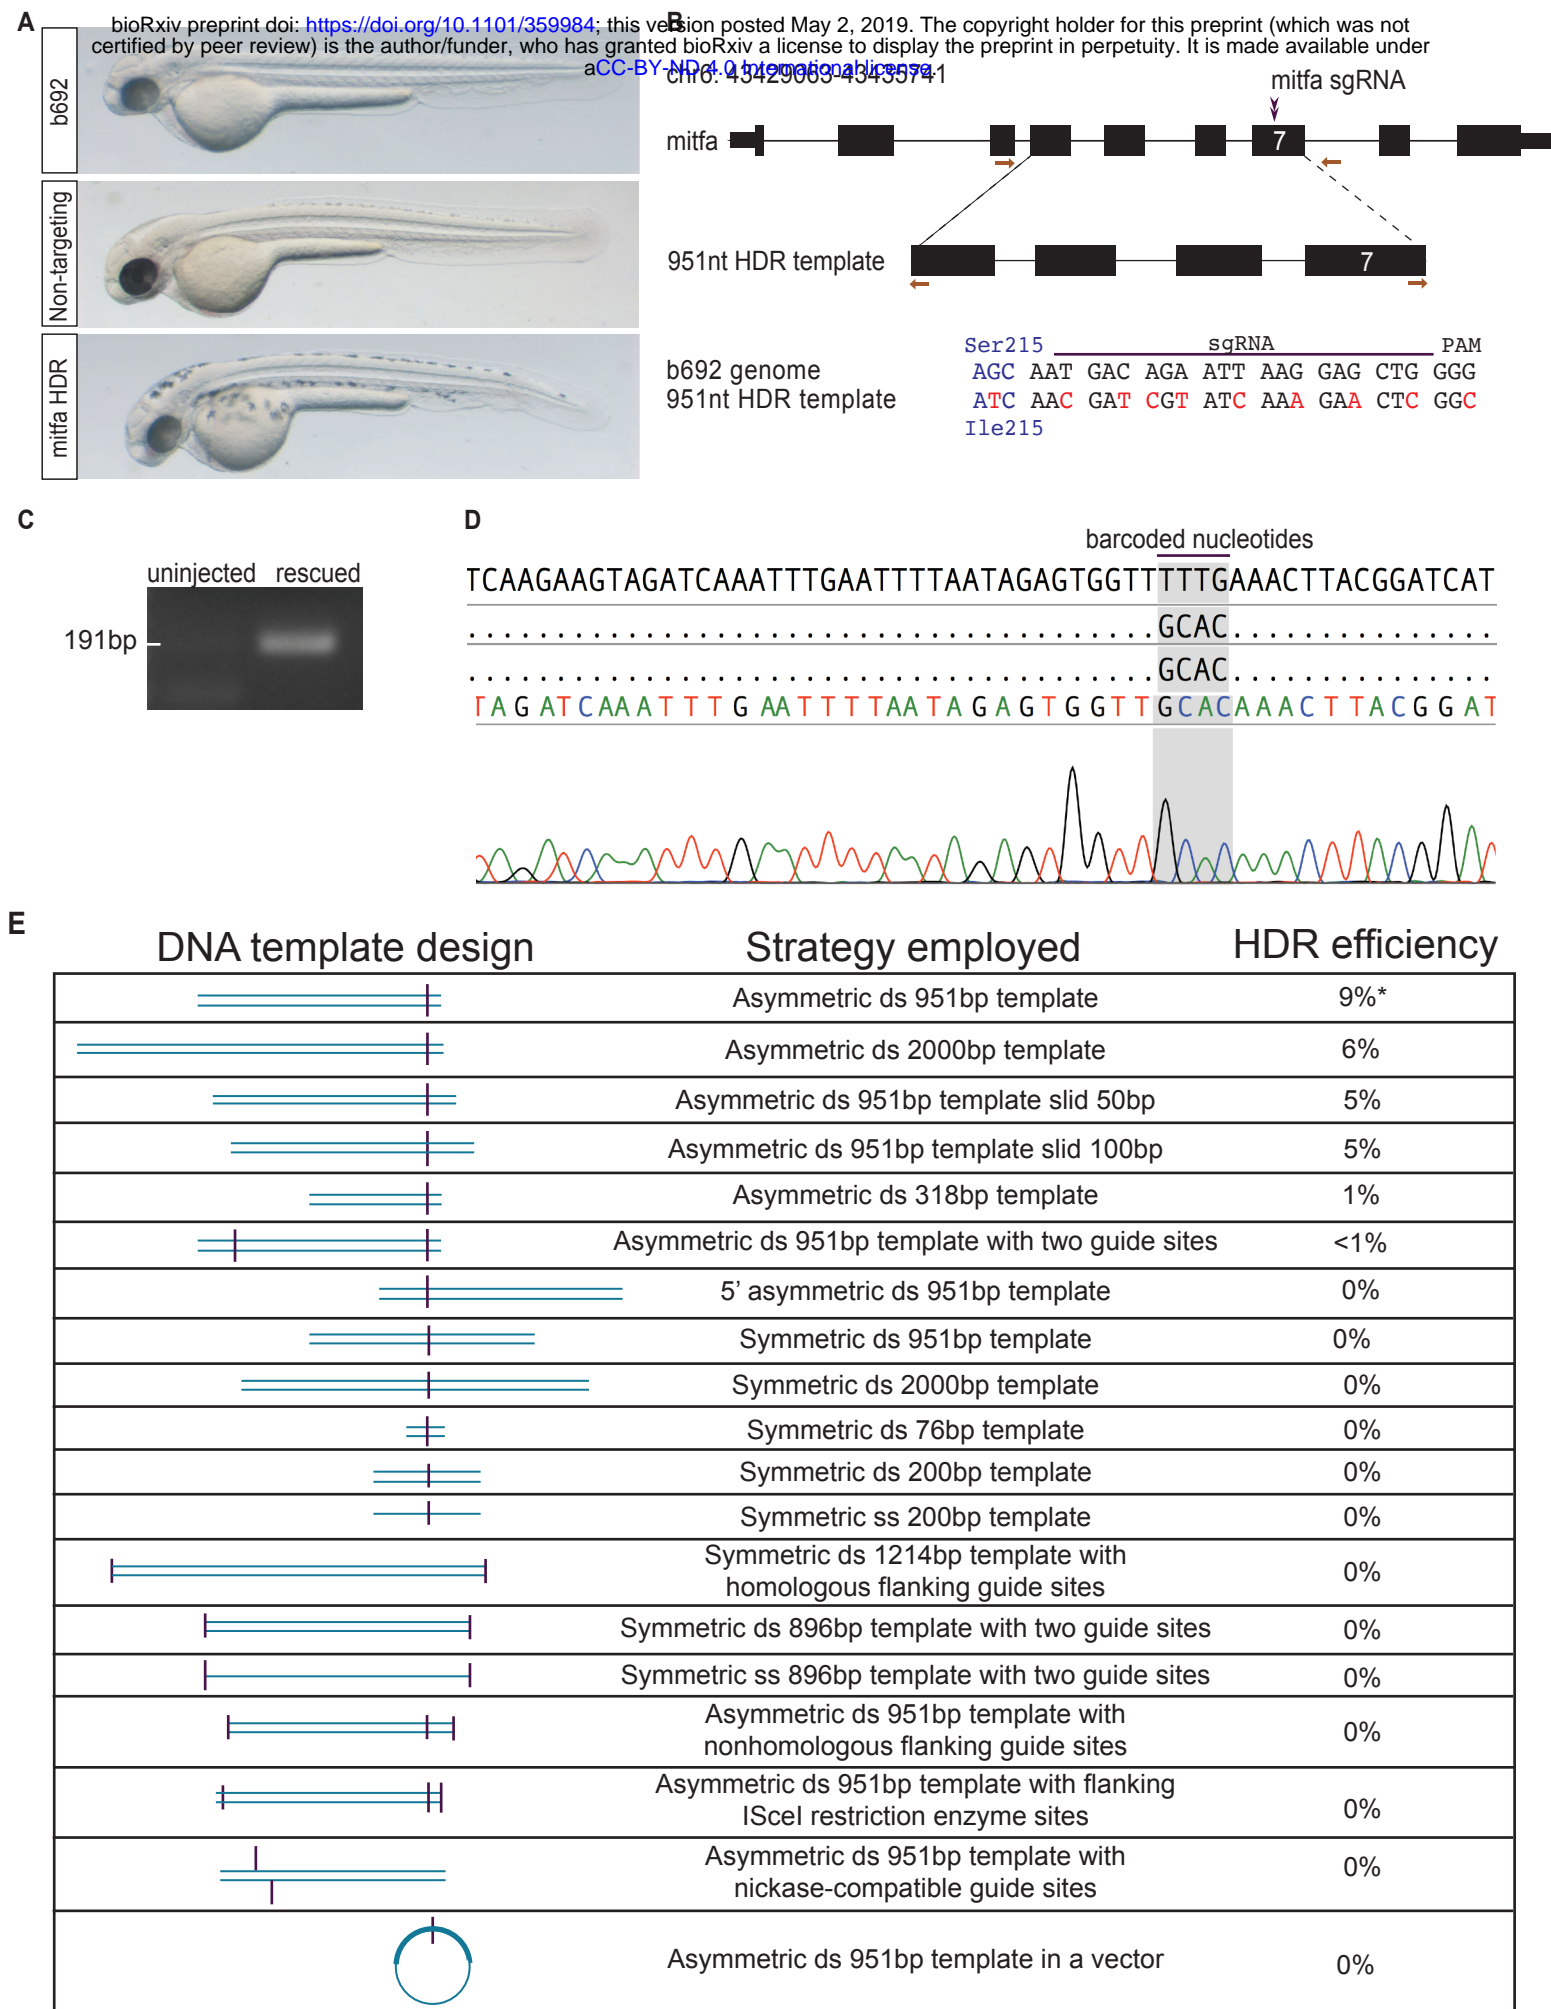

Figure 2



**A**

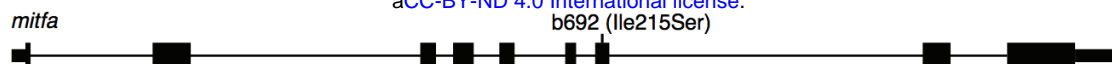

chr6:43,432,611-43,432,688

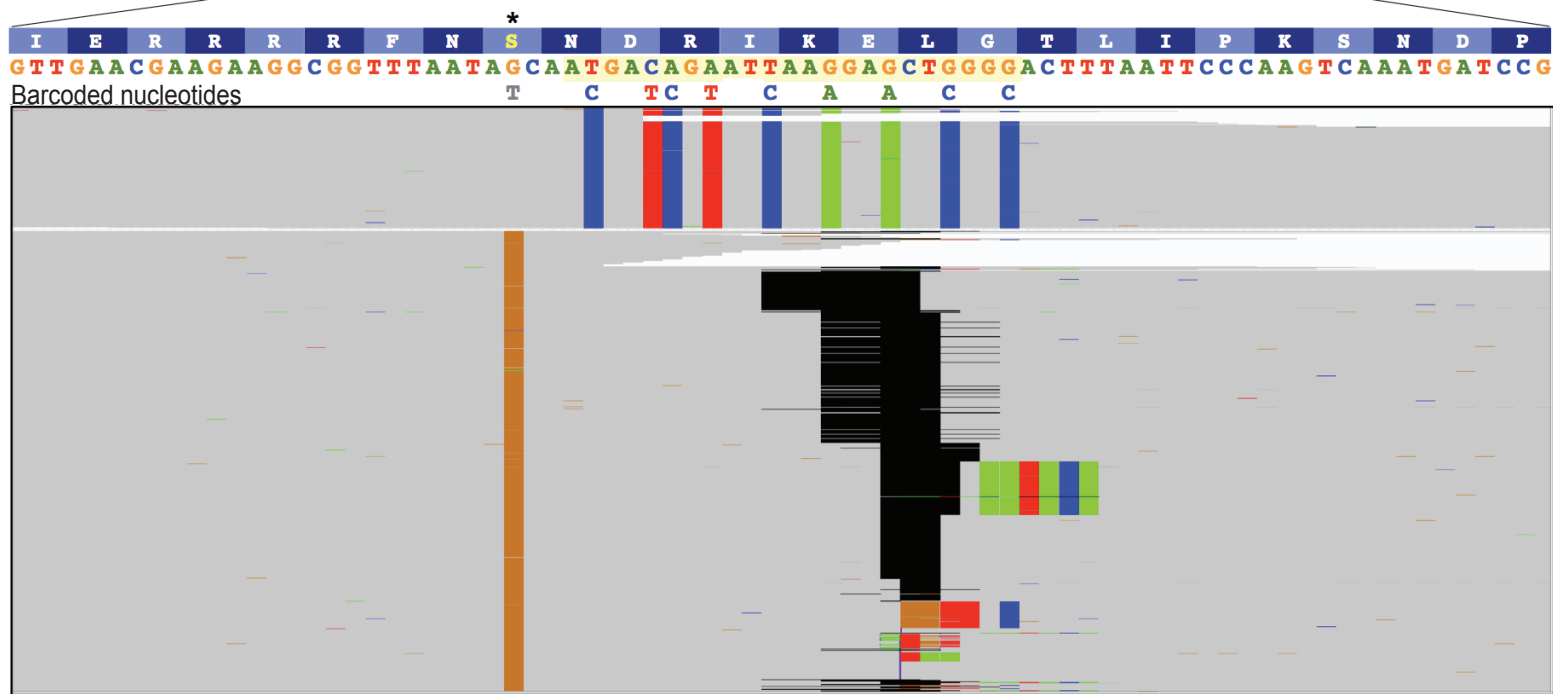

**B**

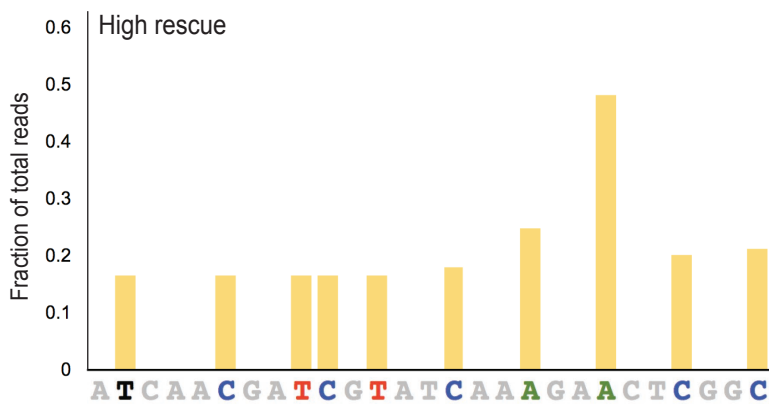

**C**

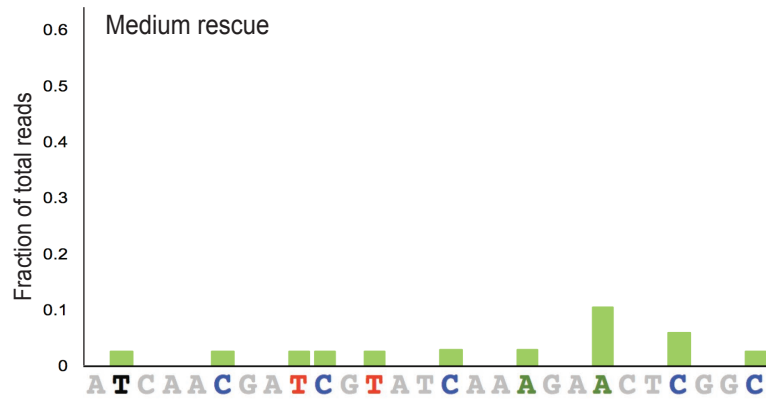

**D**

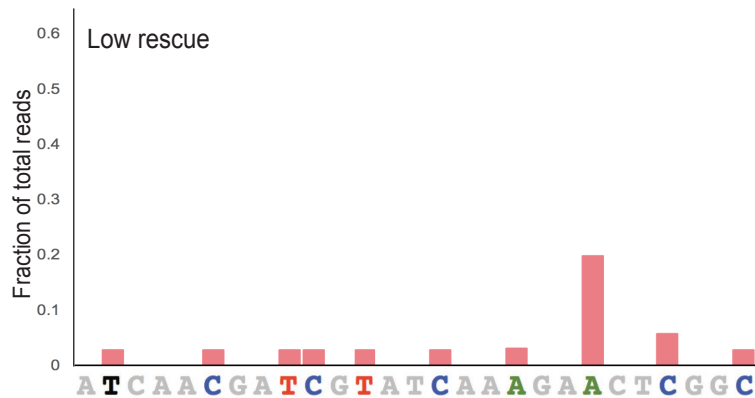

**E**

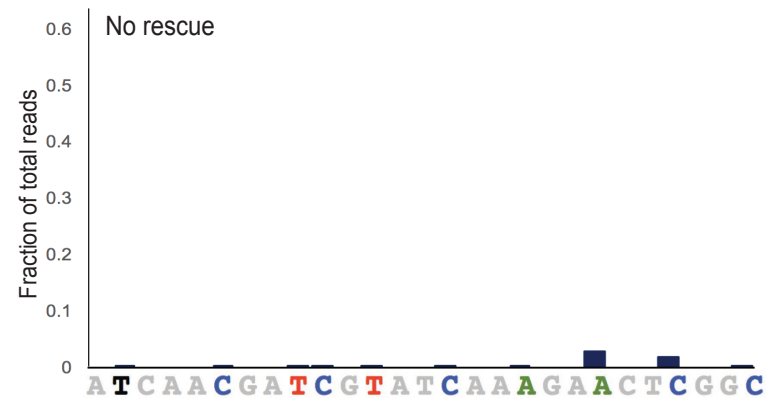

Figure 3

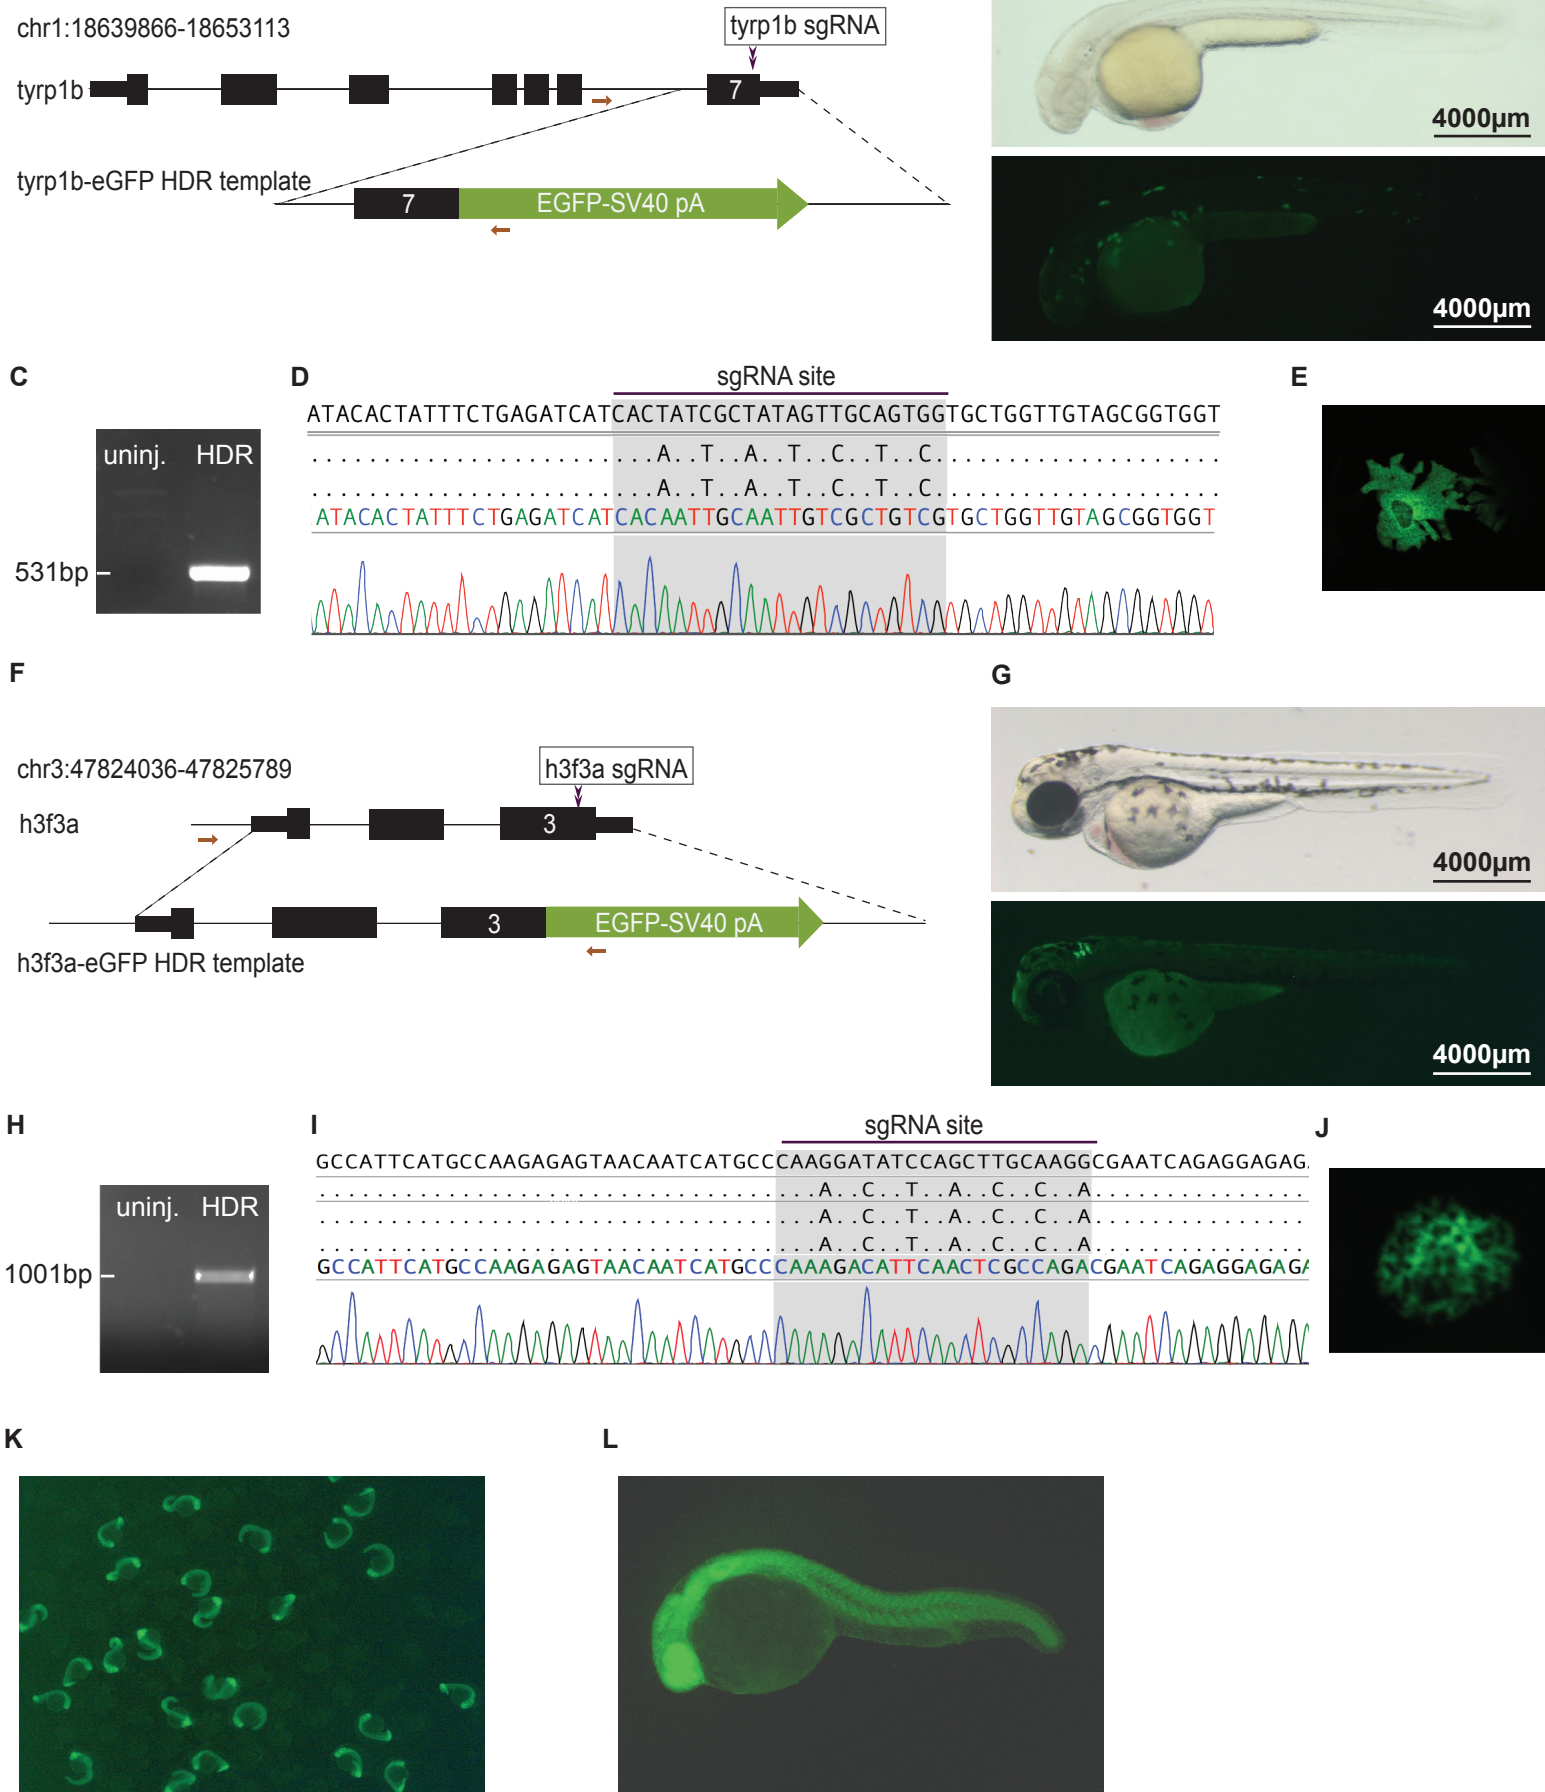

Figure 4

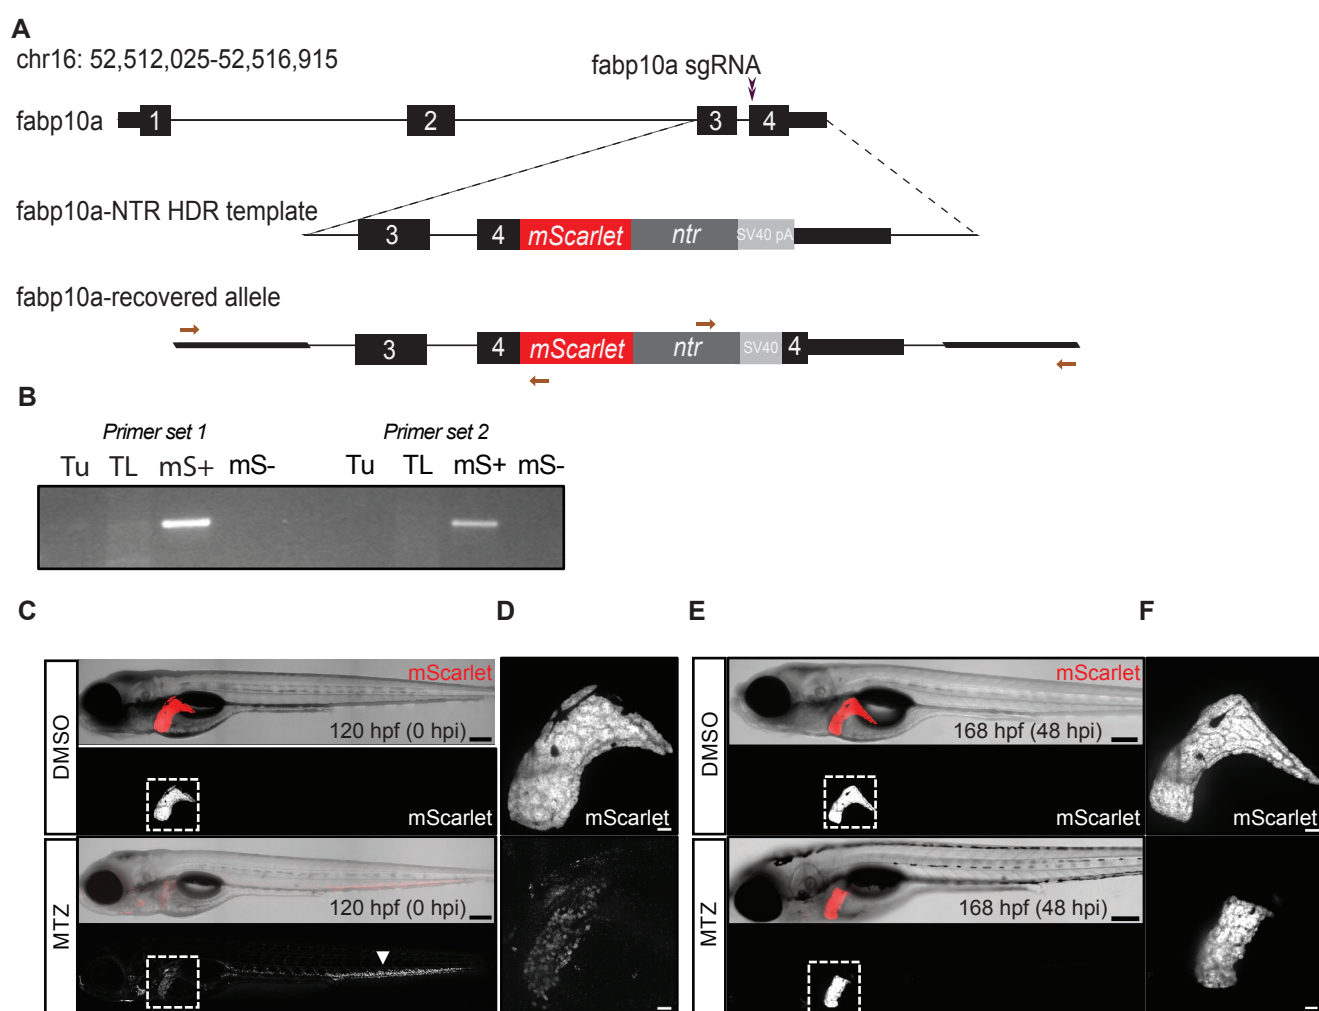

Figure 5

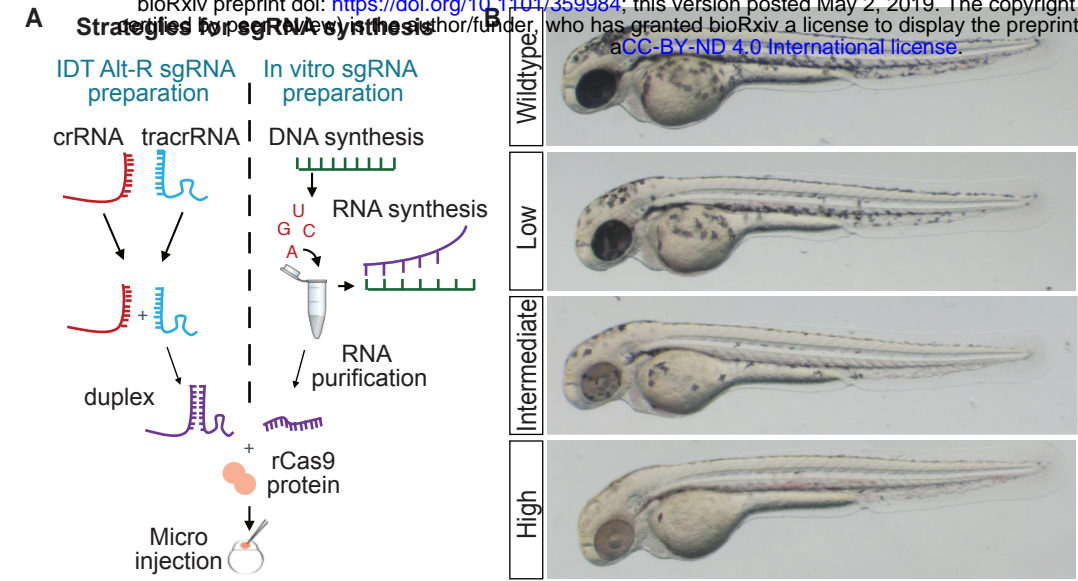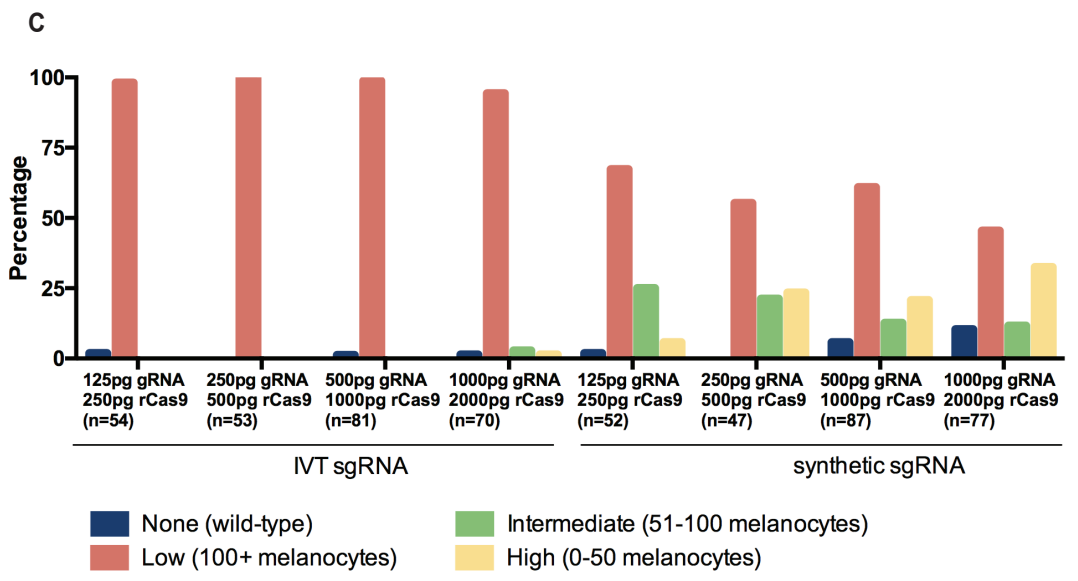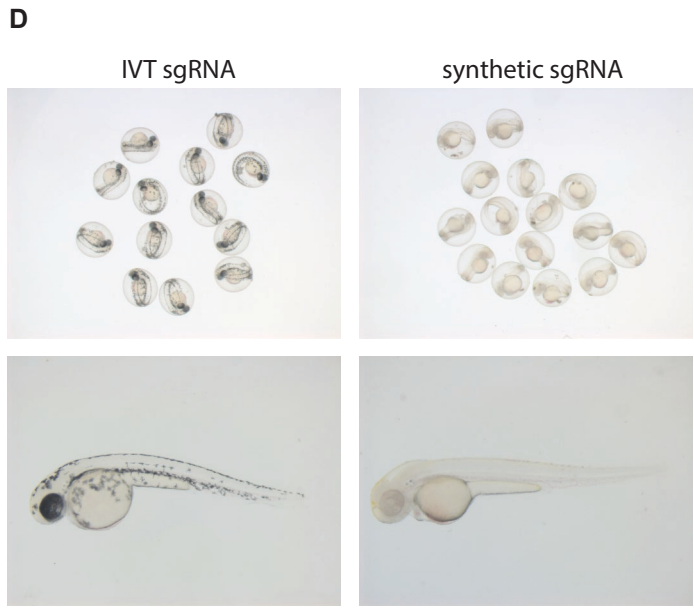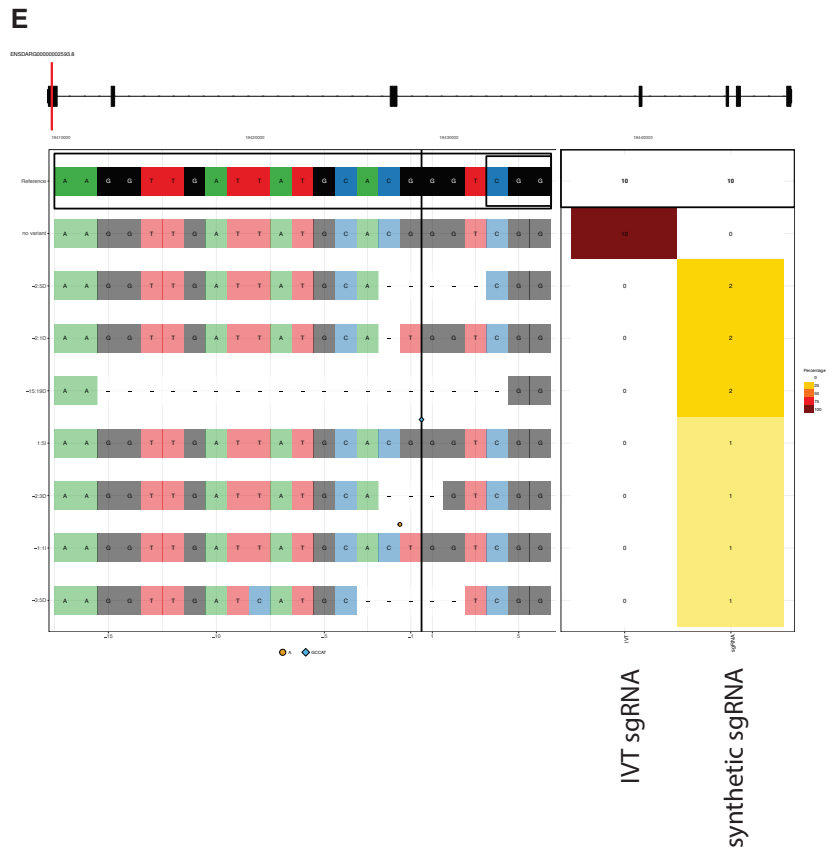

Supplementary Figure 1

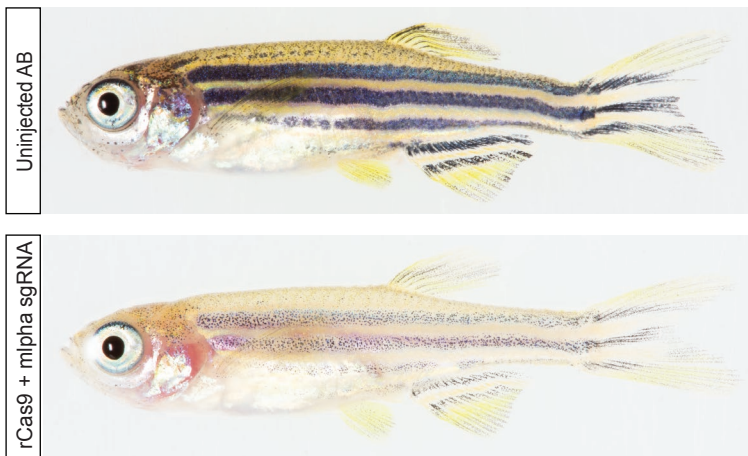

A

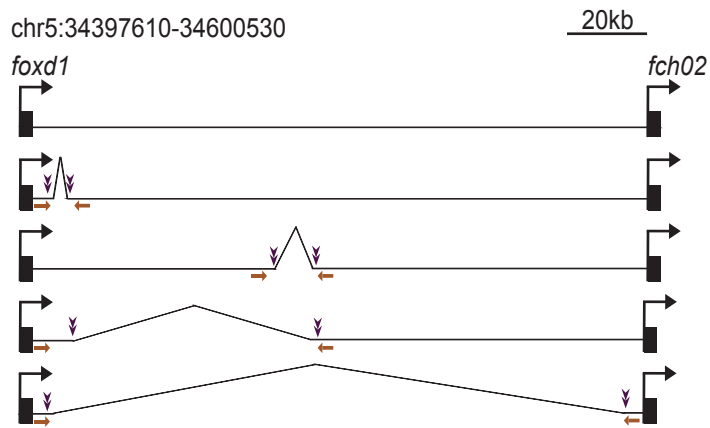

B

| sgRNAs   | Predicted deletion size | Observed deletion frequency |
|----------|-------------------------|-----------------------------|
| sgRNA1+2 | 0.45kb                  | 5/10 (50%)                  |
| sgRNA3+4 | 4.3kb                   | 7/24 (29%)                  |
| sgRNA2+4 | 52kb                    | 3/8 (38%)                   |
| sgRNA1+5 | 124kb                   | 2/23 (9%)                   |

C

rCas9 + sgRNA1 + sgRNA2

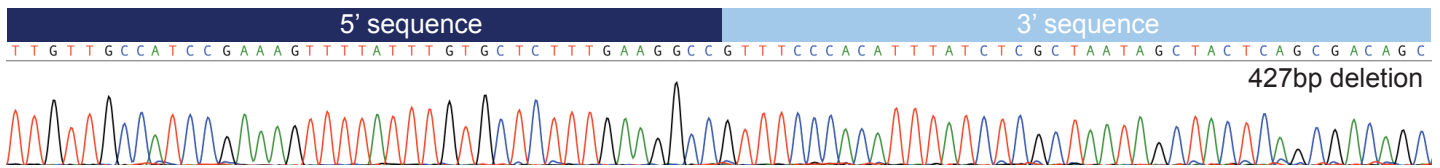

D

rCas9 + sgRNA3 + sgRNA4

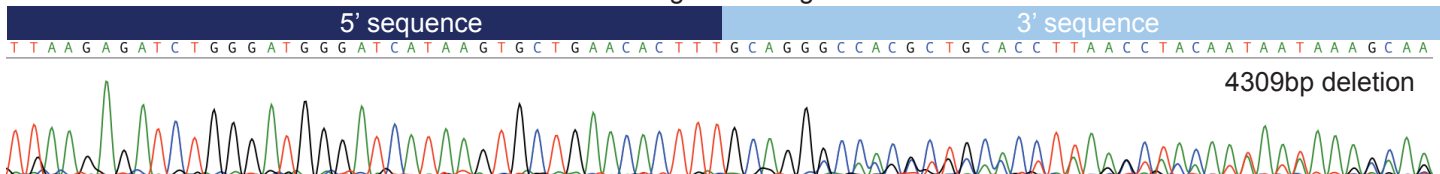

E

rCas9 + sgRNA2 + sgRNA4

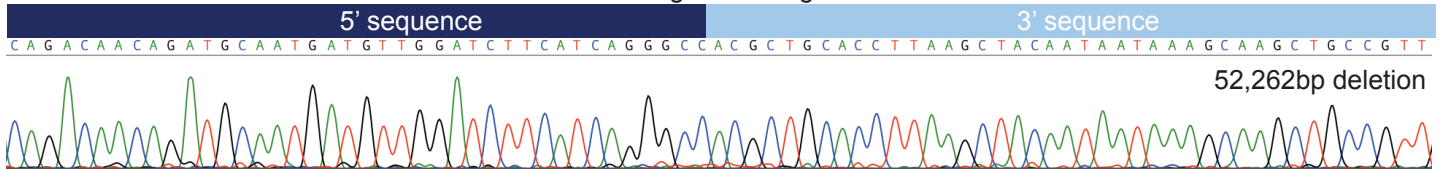

F

rCas9 + sgRNA1 + sgRNA5

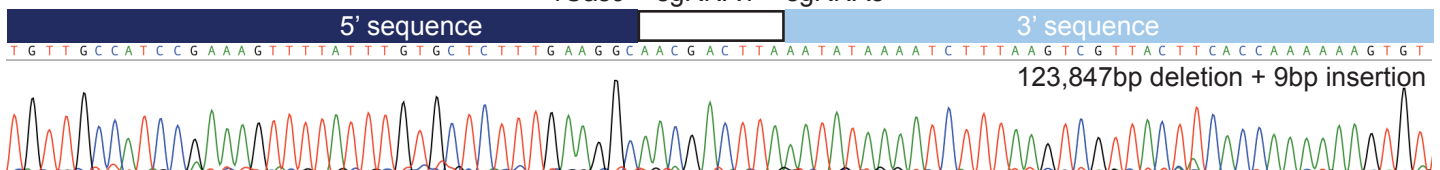

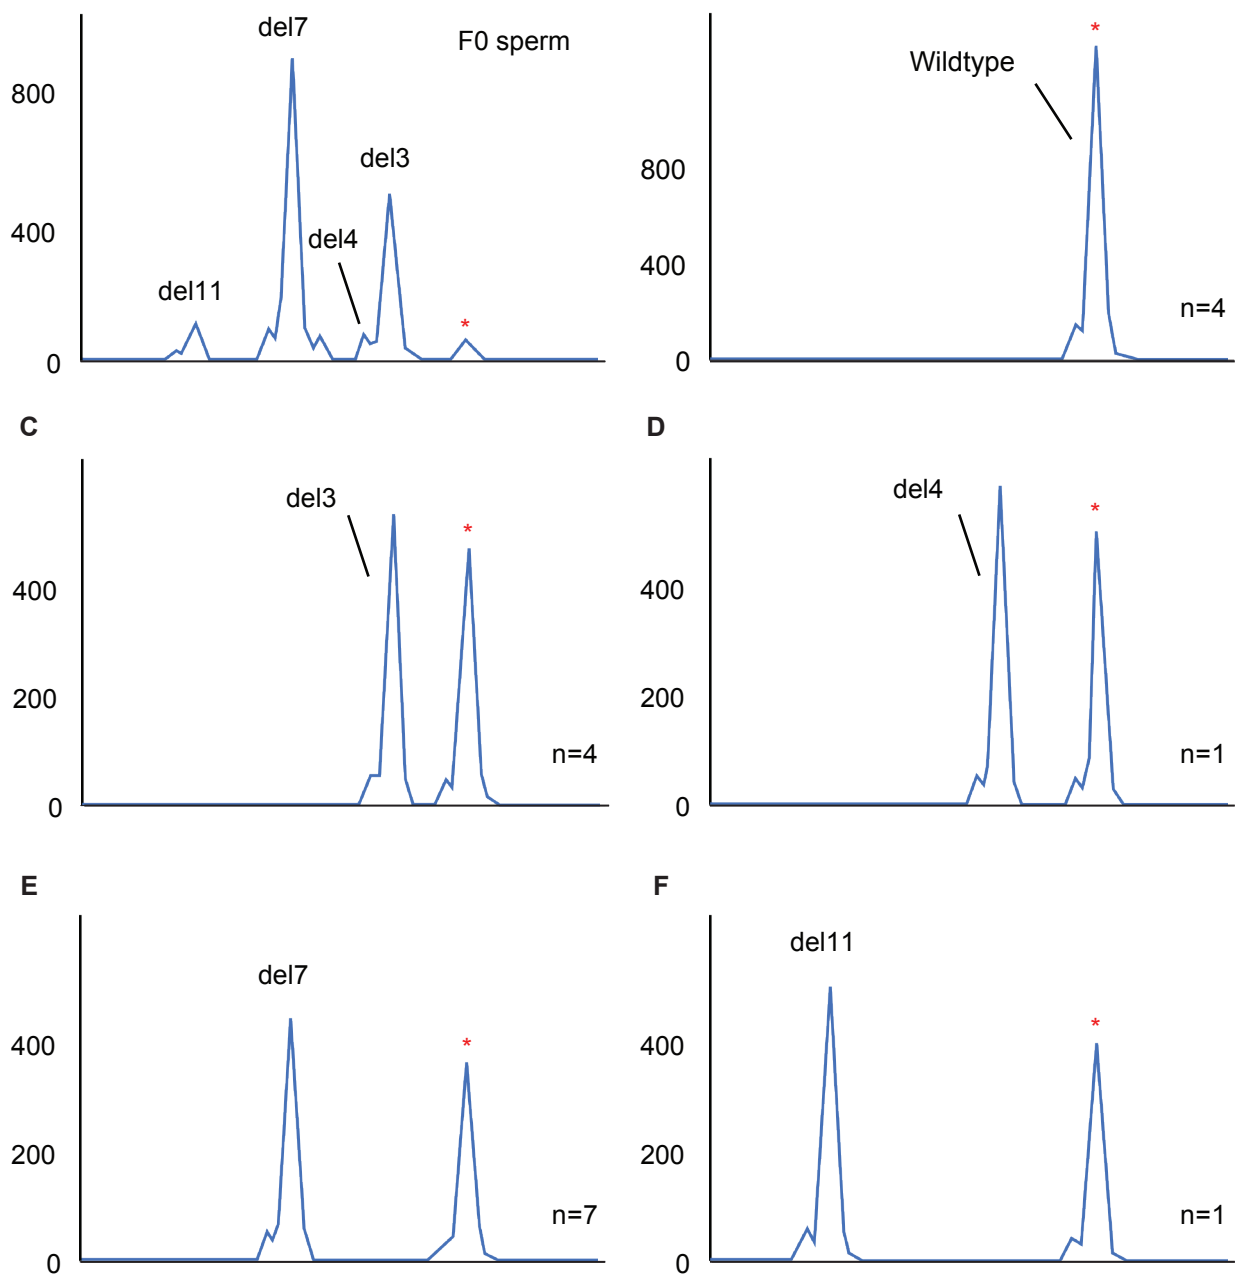

G

|              | <b>F0 Sperm</b> | <b>F1 Progeny</b> |
|--------------|-----------------|-------------------|
| <b>del11</b> | 7.4%            | 5.9%              |
| <b>del7</b>  | 58.9%           | 41.2%             |
| <b>del4</b>  | <5%             | 5.9%              |
| <b>del3</b>  | 33.7%           | 23.5%             |
| <b>WT</b>    | <5%             | 23.5%             |
| <b>Total</b> | 100.0%          | 100.0%            |

A

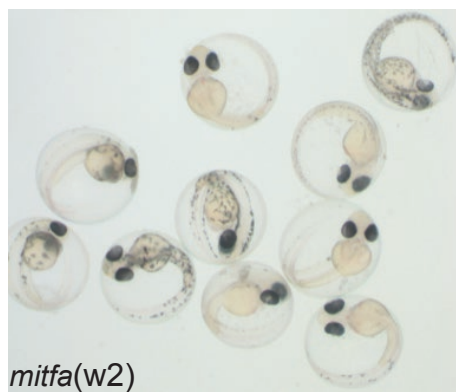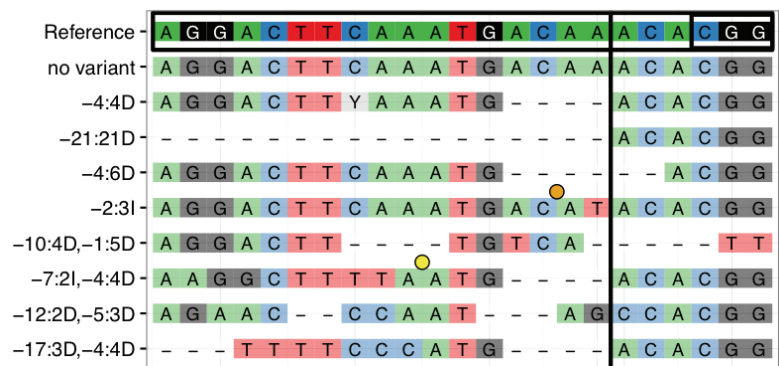

C

AB

*mitfa(b692)*

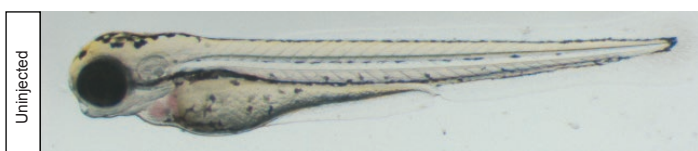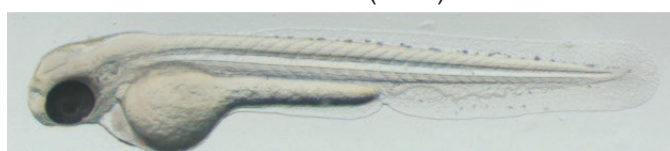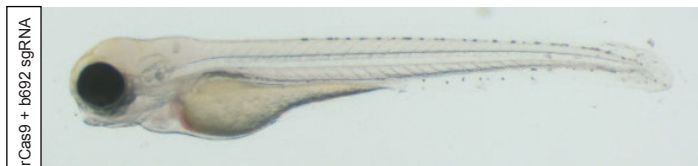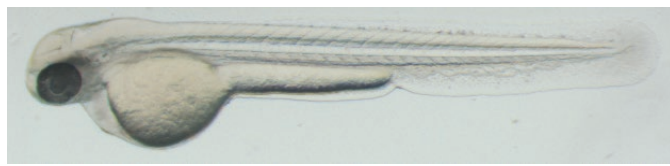



Supplementary Table 1

| <b>sgRNA name</b> | <b>sgRNA Sequence</b>     |
|-------------------|---------------------------|
| tyr               | TGAAAGTTACAACCTCCGCG(AGG) |
| slc24a5 (golden)  | GGTCTCTCGCAGGATGTTGC(TGG) |
| mitfa(w2)         | AGGACTTCAAATGACAAACA(CGG) |
| mitfa(b692)       | ATGACAGAATTAAGGAGCTG(GGG) |
| tyrp1b            | CACTATCGCTATAGTTGCAG(TGG) |
| mlpha             | AATGACCTCCCACACATGCT(TGG) |
| h3f3a             | CAAGGATATCCAGCTTGCA(AGG)  |
| non-targeting     | TGCTGATGTCTTGGTTGAAT(TGG) |
| deletion_1        | TGTGCTCTTTGAAGGCCATG(AGG) |
| deletion_2        | TGTGGGAAACGGCATATATG(AGG) |
| deletion_3        | AATCACCGAGAAATTGGAG(AGG)  |
| deletion_4        | CAGGCAGGATCAAAGAAGGC(AGG) |
| deletion_5        | AATAGCTCATAAAGACGGTG(AGG) |
| slc6a15           | GACTCCATCTCAGAGGGTGG(AGG) |
| fabp10a           | GTGCAGACGCTGACAGTCGG(AGG) |
| slc45a2 (albino)  | AAGGTTGATTATGCACGGGT(CGG) |
| wee1              | TGATACCCCCACACCCCAA(AGG)  |

## Supplementary Table 2

| <b>Primer Name</b>              | <b>Primer Sequence</b>      |
|---------------------------------|-----------------------------|
| tyr gRNA validation (F)         | AATGTCGTTCACTCTGCTGTTG      |
| tyr gRNA validation (R)         | GTGACCGTGCTGTTGTACCTT       |
| gol gRNA validation (F)         | TGCTGGATGCCCTTGTCAAT        |
| gol gRNA validation (R)         | AAAGTAGGCGACACTGACGG        |
| mitfa(w2) gRNA validation (F)   | GTGGATTGAGGTTCCCTTCA        |
| mitfa(w2) gRNA validation (R)   | CGGATAATTCCTTTTGACG         |
| mitfa(b692) gRNA validation (F) | CAGAGCCCTGGCAAAGAGA         |
| mitfa(b692) gRNA validation (R) | TGTGTGCCTGCTGGGATTTA        |
| mitfa_next_gen (F)              | GCAGTTATTAATGATAATGTCTCG    |
| mitfa_next_gen (R)              | GGACTTAAGTAAATCAAGAAGTAGATC |
| tyrp1b gRNA validation (F)      | ATGGAGCAGTTGAGGCTGTC        |
| typ1b gRNA validation (R)       | ATCCTCTGAGTAGCGCCTGA        |
| mlpha gRNA validation (F)       | CATTCAGTCTTTAAACATGG        |
| mlpha gRNA validation (R)       | AGTGTTAGACGATGTTAAA         |
| h3f3a gRNA validation (F)       | TCTTAGCGGAAGTGGTGCAA        |
| h3f3a gRNA validation (R)       | AACAGTTCGGGCCTGAAAT         |
| downstream_foxd1_deletion_1 (F) | TCACTGAGGCCTCTGACAGA        |
| downstream_foxd1_deletion_2 (R) | TACTCCTTTGGACAGGGCCA        |
| downstream_foxd1_deletion_3 (F) | CTCTGTGGTCTATTTCTCTCC       |
| downstream_foxd1_deletion_4 (R) | CAGAAGGTGAAGCAGCCTCA        |
| downstream_foxd1_deletion_5 (R) | ACCACGTCTTCAAGGGCTTC        |
| fabp10a gRNA validation (F)     | ATGGAGGAAAGCTGGTCTGC        |
| fabp10a gRNA validation (R)     | TGCTCTTCCTGATCATGGTGG       |
| albino gRNA validation (F)      | CGGCTGTTTTTGGAGTGGTG        |
| albino gRNA validation (R)      | ACCTTCACCCACCTGTTGTG        |
| wee1 gRNA validation (F)        | TGGACTCTCCAGTACCTTTGC       |
| wee1 gRNA validation (R)        | GCTCATCCACTAGGTAATGC        |
| mitfa_HDR_detection (F)         | GCTACAGTGATGACATTCTTGG      |
| mitfa_HDR_detection (R)         | GCATGATTGCTGTACATATCAAGCAAA |
| tyrp1b_HDR_detection (F)        | CGACTGGCCTACAAGGTGAT        |
| typ1b_HDR_detection (R)         | CGCCGTCCAGCTCGACCA          |
| h3f3a_HDR_detection (F)         | AGGACACGTGCATGAAGTTT        |
| h3f3a_HDR_detection (R)         | GAACTTCAGGGTCAGCTTGC        |
| fabp10a_HDR_detection_1 (F)     | GGAAGGGCGTGGTCAAGTAT        |
| fabp10a_HDR_detection_1 (R)     | GAACTGAGGGGACAGGATG         |
| fabp10a_HDR_detection_2 (F)     | GCGAACGATAAAGGTCGCAAG       |
| fabp10a_HDR_detection_2 (R)     | CTCTGATGAATAAATACGGC        |
